1  
2  
3  
4  
5  
6  
7  
8  
9  
10  
11  
12  
13  
14  
15  
16  
17  
18  
19  
20  
21  
22  
23  
24  
25  
26  
27  
28  
29  
30  
31  
32  
33  
34  
35  
36  
37  
38

# **Genome-wide association and function studies identify Mfd as a critical RNA polymerase co-factor at hard-to-transcribe regions**

**Mark N. Ragheb<sup>1</sup> and Houra Merrikh<sup>2,3,\*</sup>**

<sup>1</sup> Molecular and Cellular Biology Graduate Program and Medical Scientist Training Program, University of Washington, Seattle, WA, USA.

<sup>2</sup> Department of Biochemistry, Vanderbilt University, Nashville, TN 37205, USA

<sup>3</sup> Department of Pathology, Microbiology, and Immunology, Vanderbilt University Medical Center, Nashville, TN 37232, USA

\*Corresponding (Lead) author  
Houra Merrikh  
Email: [houra.merrikh@vanderbilt.edu](mailto:houra.merrikh@vanderbilt.edu)  
Tel: 615-343-3846

39 **Abstract**

40 RNA polymerase (RNAP) encounters various roadblocks during transcription. Given that  
41 these obstacles can change the dynamics of RNAP movement, they are likely to influence  
42 transcription either directly or through RNAP associated factors. One such factor is Mfd; a highly  
43 conserved DNA translocase that is thought to primarily function in repair of DNA lesions that  
44 have stalled RNAP. However, the interaction between Mfd and RNAP may also be important for  
45 transcription regulation at generally hard-to-transcribe regions where RNAP frequently stalls in  
46 living cells, even in the absence of DNA lesions. If so, then Mfd may function as a critical RNAP  
47 co-factor and a transcription regulator, at least for some genes. This model has not been directly  
48 tested.

49 Here, we assessed the function of Mfd *in vivo* and determined its impact on RNAP  
50 association and transcription regulation. We performed genome-wide studies, and identified  
51 chromosomal loci bound by Mfd. We found many genomic regions where Mfd modulates RNAP  
52 association and represses transcription. Additionally, we found that almost all loci where Mfd  
53 associates and regulates transcription contain highly structured regulatory RNAs. The RNAs in  
54 these regions regulate a myriad of biological processes, ranging from metabolism, to tRNA  
55 regulation, to toxin-antitoxin functions. We found that transcription regulation by Mfd, at least at  
56 the toxin-antitoxin loci, is essential for cell survival. Based on these data, we propose that Mfd is  
57 a critical RNAP co-factor that is essential for transcription regulation at difficult-to-transcribe  
58 regions, especially those that express structured regulatory RNAs.

59

60

61

62

63 **Keywords:** Mfd, RNA polymerase, transcription termination, regulatory RNAs, RNA secondary  
64 structure, toxin-antitoxins

65 **Significance**

66 The Mfd translocase recognizes stalled RNAPs. This recognition is generally thought to facilitate  
67 transcription-coupled DNA repair, based largely on data from biochemical studies. Little is  
68 known about Mfd's function in living cells, especially in the absence of exogenous DNA  
69 damage. Our data show that Mfd is a critical RNAP co-factor that modulates RNAP association  
70 and regulates transcription at various loci, especially those containing highly structured,  
71 regulatory RNAs. This work improves our understanding of Mfd's function in living cells and  
72 assigns a new function to Mfd as a regulator of transcription at hard-to-transcribe regions where  
73 maintaining transcriptional equilibrium (e.g. at toxin-antitoxin loci) is essential for viability.  
74 Altogether, this work also expands our understanding of how transcription is regulated at  
75 difficult-to-transcribe loci.

76

77

78

79

80

81

82

83

84

85

86

87

88

89

90

## 91 **Introduction**

92 Timely and efficient transcription is a fundamental requirement for maintaining cellular  
93 homeostasis. The process of transcription elongation is discontinuous, with RNA polymerase  
94 (RNAP) processivity altered by a wide range of obstacles. These obstacles vary in severity,  
95 from pause sites that slow the rate of RNAP(1–3) to more severe obstacles, such as protein  
96 roadblocks and the replication fork, which induce the reverse translocation of RNAP with  
97 respect to both DNA and nascent RNA (RNAP backtracking) (4–7). Roadblocks to RNAP  
98 processivity are both prevented and resolved through various mechanisms in bacteria, including  
99 the coupling of transcription and translation, as well as various cellular factors that help re-  
100 establish transcription elongation (i.e. anti-backtracking factors)(8).

101

102 *In vitro* work shows that the DNA translocase Mfd utilizes its RNAP binding properties and  
103 forward translocase activity to rescue arrested RNAP, and in doing so, can restore RNAP to its  
104 active elongation(9) as well as promote transcription termination state(10). However, despite  
105 decades of research on the biochemical characteristics of Mfd, the endogenous contexts in  
106 which its translocase and anti-backtracking functions become critical for transcription remains  
107 elusive.

108

109 Mfd was initially described as a critical DNA repair factor *in vivo* that promotes transcription-  
110 coupled repair (TCR)(11–13). In the TCR pathway, Mfd removes stalled RNAP at bulky DNA  
111 lesions to expose the offending lesion to the nucleotide excision repair (NER) pathway via its  
112 UvrA binding capacity (for a review of the pathway, see (14)). However, cells lacking Mfd show  
113 little to no sensitivity to DNA damaging agents that promote RNAP stalling(15, 16), especially  
114 relative to other TCR factors(17, 18). Such data suggests that Mfd may have a broader cellular  
115 function outside of DNA repair. Indeed, further research has implicated Mfd in other cellular  
116 roles, including increased mutagenesis at specific loci where collisions between the replication

117 and transcription machineries occur(8), as well as regulating catabolite repression in *Bacillus*  
118 *subtilis*(19, 20). Additionally, recent *in vitro* experiments have shown that Mfd is capable of  
119 autonomously translocating on DNA in the absence of a lesion, but whether this is the *case in*  
120 *vivo* is unclear (21).

121  
122 Despite our limited understanding of Mfd's central cellular functions, its high level of  
123 conservation in bacteria implies a fundamental role for Mfd that may be separate from TCR. Mfd  
124 is highly structurally conserved, and complementation experiments across divergent species  
125 shows that at least some of its functions are also highly conserved(15). In addition, the  
126 expression of Mfd is thought to be constitutive, suggesting a possible homeostatic role in  
127 regulating transcription. Indeed, recent work suggests that Mfd plays a housekeeping function in  
128 cells by associating with RNAP in the absence of exogenous stressors(22). However, the role of  
129 Mfd in association with RNAP and what particular genomic sites (if any) Mfd may be acting  
130 upon, particularly in the absence of exogenous stress, remains unclear.

131  
132 In this work, we define the *in vivo* role of Mfd in regulating transcription by identifying specific  
133 regions in the genome where RNAP and transcription are altered in the absence of Mfd. We  
134 found that Mfd promotes RNAP release and transcription termination at regions containing  
135 highly structured regulatory RNAs. We also determined that Mfd's activity is important for  
136 regulating transcription at various critical loci in *B. subtilis*, including toxin-antitoxin systems, and  
137 that misregulation in the absence of Mfd can be lethal. Our work suggests that RNA secondary  
138 structure is a major impediment to transcription *in vivo* and that transcription regulation by Mfd is  
139 especially important at sites transcribing highly structured RNAs. Based on these and other  
140 results, we propose that Mfd is an essential RNAP co-factor that regulates transcription,  
141 especially at regions harboring critical regulatory RNAs.

142

## 143 **Results**

### 144 **Mapping the genomic loci where Mfd's associates**

145 We began by assessing Mfd's genome-wide association using chromatin immunoprecipitation  
146 sequencing (ChIP-seq). We constructed a *B. subtilis* strain where Mfd is C-terminally Myc-  
147 tagged (Fig. S1). To identify the chromosomal regions where Mfd associates, we harvested  
148 exponentially growing cells and performed ChIP-seq analysis. We controlled for potential ChIP  
149 artifacts by comparing this signal to ChIP-seq performed using Myc antibody in *B. subtilis*  
150 lacking a Myc-tagged Mfd (Fig. 1A). Under these conditions, we found 489 genes out of 5755  
151 genes analyzed (a total of 8%) of the *B. subtilis* genome exhibit preferential Mfd association  
152 (defined as one standard deviation greater than the average Mfd ChIP signal across all genes)  
153 (Dataset S1).

154

### 155 **Mfd's genomic association pattern correlates with that of RNAP**

156 Given the known physical interaction between Mfd and RNAP(23), we hypothesized that Mfd  
157 binding peaks would be correlated with RNAP association on the genome. We performed ChIP-  
158 seq of RpoB, the  $\beta$  subunit of RNAP using a native antibody. We indeed found that Mfd  
159 association genome-wide is largely correlated with RpoB occupancy (Pearson coefficient 0.68)  
160 (Fig. 1B and Fig. S2), suggesting that Mfd functions as an RNAP co-factor in *B. subtilis*.

161

### 162 **Mfd requires interaction with RNAP for its association with all genomic loci**

163 Mfd is a multimodular protein, consisting of eight domains connected by flexible linkers (23). Of  
164 these domains, the RNAP interacting domain (RID) and the translocase module (composed of  
165 domains D5 and D6) are critical for Mfd's ability to rescue stalled transcription complexes (24,  
166 25). Mfd is thought to be recruited to the identified genomic regions through its interaction with  
167 RpoB. We therefore tested whether the interaction of Mfd with RpoB is critical for its recruitment  
168 to the genomic loci we identified. Prior *in vitro* work suggested RID mutations abrogate the

169 interaction between Mfd and RNAP(23). We therefore constructed a Mfd-myc strain with a  
170 mutation at the L522 residue to disrupt Mfd's binding to RpoB, without disrupting the stability or  
171 folding of Mfd, as described in *Escherichia coli* (23). Upon confirming that the *B. subtilis* L522A  
172 mutation disrupted Mfd's interaction with RNAP via a bacterial 2-hybrid assay (Fig. S3), we  
173 performed ChIP-seq experiments with this mutant. The ChIP signal we detected in WT strains  
174 was abrogated in the strain expressing the L522A allele (Fig. 1C). These results strongly  
175 suggested that Mfd's interaction with RNAP is essential for its recruitment to all genomic loci  
176 identified in the previous experiments. These findings suggest that Mfd functions as a genome-  
177 wide RNAP co-factor *in vivo*.

178

### 179 **Mfd's association with DNA requires transcription elongation**

180 *In vitro*, Mfd helps promote the rescue of arrested transcription elongation complexes (TECs),  
181 yet how Mfd recognizes stalled RNAP *in vivo* remains unclear. We therefore sought to  
182 discriminate whether Mfd association with various genomic loci was facilitated via loading during  
183 the transcription initiation or elongation phase. To distinguish between transcription initiation and  
184 elongation, we utilized the antimicrobial rifampicin, which directly blocks transcription  
185 initiation(26, 27), subsequently eliminating the formation of transcription elongation complexes  
186 (TECs). Rifampicin treatment largely eliminated Mfd ChIP-seq binding signal (Fig. 1D),  
187 suggesting that active transcription elongation (and not initiation) is a requirement for Mfd  
188 association with RNAP, and subsequently, genomic regions.

189

### 190 **Mfd promotes release of RNAP at some genomic loci**

191 Mfd can function to promote both transcription elongation as well as transcription termination, at  
192 least under *in vitro* conditions (9, 10). However, the importance of these functions *in vivo*  
193 remained elusive. We wondered if Mfd's close association with RNAP occupancy *in vivo* was  
194 relevant for transcription elongation, transcription termination, or both. We therefore performed

195   ChIP-seq of RpoB in WT and *Δmfd* strains to look for genes where RpoB occupancy was  
196   altered in the absence of Mfd. ChIP-seq experiments did not detect alterations in RpoB  
197   occupancy at the majority of genes where Mfd associates based on our Mfd ChIP-seq studies.  
198   This may be a result of various factors, such as the existence of redundant transcription-  
199   associated factors, the specific growth conditions of the experiment, or potential limitations of  
200   detection thresholds which are possible in an ensemble assay such as ChIP-seq. However, we  
201   did find a number of genes where RpoB occupancy either increased or decreased in the *Δmfd*  
202   strain compared to WT (Fig. 2A). We specifically noticed a bias towards a greater number of  
203   genes that exhibited increased (rather than decreased) RpoB occupancy in the *Δmfd* strain.  
204   Quantification of these results revealed that a total of 116 genes exhibited at least a two-fold  
205   increase, while 53 genes exhibited at least a two-fold decrease in RpoB occupancy without Mfd.  
206   Many of these genes are within the same operon, and therefore are expressed as single  
207   transcripts. Thus, rather than single genes, we grouped and analyzed the identified genes as  
208   transcription units (TUs)(28). Our analysis revealed that *Δmfd* strains contain 71 TUs with at  
209   least one gene containing a minimum of two-fold increase and 31 TUs with at least one gene  
210   containing a minimum of two-fold decreased in RpoB occupancy compared to WT (Table 1,  
211   Datasets S2 and S3).

212  
213   We next wanted to determine whether the changes in RpoB occupancy observed in *Δmfd* were  
214   directly due to Mfd's activity at those regions or whether we were detecting indirect effects. To  
215   address this, we looked for a correlation between the regions where Mfd associates (ChIP-seq  
216   experiments) and where there are also changes in RpoB association levels in the absence of  
217   Mfd. We observed Mfd association at many of the genes with increased RpoB occupancy in the  
218   *Δmfd* strain, but not at any of the genes with decreased RpoB occupancy in the *Δmfd* strain  
219   (Fig. 2B). More specifically, 52 of the 116 genes (35 of the 71 TUs) with increased RpoB  
220   occupancy in *Δmfd* compared to WT were regions with Mfd association, while we did not detect



221 Mfd association at any of the 53 genes (31 TUs) with decreased RpoB occupancy. From these  
222 findings we concluded that increased RNAP occupancy (but not decreased) is a direct result of  
223 RNAP release/termination by Mfd. This conclusion is in line with prior observations made in  
224 biochemical experiments (10, 29)

225

### 226 **Regions where Mfd promotes RNAP release are enriched for regulatory RNAs**

227 *In vitro*, Mfd's translocase activity can help release RNAP exposed to various obstacles.  
228 However, whether there are endogenous hotspots of RNAP stalling that requires Mfd function  
229 remained unknown. Furthermore, if such hotspots exist, the nature of the potential obstacles  
230 remained unclear. Intriguingly, 92% of the TUs that showed both an increase in RNAP density in  
231 the  $\Delta mfd$  strain and direct Mfd association at those loci express a minimum of one regulatory  
232 RNA (Table S1). These regulatory RNAs are a subset of the 1583 regulatory RNAs in *B.*  
233 *subtilis*, which encompass a wide variety of RNAs, including independent, non-coding  
234 transcripts, antisense RNAs, and multiple riboswitches(28). In comparison, only 39% of the TUs  
235 with decreased RNAP density in  $\Delta mfd$  strains contain regulatory RNAs (Table S2), which is  
236 consistent with the average percentage of TUs with predicted regulatory RNAs in *B. subtilis* (28,  
237 30).

238

### 239 **Regions of Mfd function are enriched for high secondary structure in RNA**

240 We hypothesized that the mechanism underlying the increase in RNAP association at the  
241 identified TUs in the  $\Delta mfd$  strain was related to RNA secondary structure impeding RNAP  
242 processivity. This hypothesis is consistent with changes in RNAP dynamics due to secondary  
243 RNA structures, such as hairpins in the context of intrinsic transcription termination, and other  
244 transcription regulatory processes(31–33). Previous work characterized the predicted secondary  
245 structure for each regulatory RNA in *B. subtilis*(30). We sought to test whether the regions with  
246 increased RNAP in  $\Delta mfd$  strains are more prone to transcribing RNAs with more stable

247 secondary structures. We determined the average minimum free energy (MFE) z-score, a proxy  
248 of RNA structure stability(34, 35), for the 42 regulatory RNAs in the TUs that had both increased  
249 RpoB density in the  $\Delta mfd$  strain and Mfd association. We then compared the results to TUs that  
250 showed no difference in RpoB density between WT and  $\Delta mfd$  strains. We found that those  
251 associated with Mfd binding and increased RpoB density in the  $\Delta mfd$  strain have significantly  
252 higher predicted RNA secondary structure relative to all regulatory RNAs (Fig. 3). This finding  
253 suggests that Mfd is critical for regulating RNAP at regions containing highly structured RNAs.

254

### 255 **RNAP termination at structured regulatory RNAs is specific to Mfd**

256 Various factors are known to help rescue arrested RNAP through different mechanisms. One of  
257 the most well-known and highly conserved factors is GreA, which functions as an RNAP  
258 antibacking factor and functions by cleaving the nascent 3' RNA that has extruded from the  
259 RNAP catalytic channel during backtracking(8, 36). To test whether the antibacking activity  
260 of GreA also contributed to RNAP release at the loci transcribing structured RNAs, we  
261 performed RpoB ChIP-seq of *B. subtilis* WT and a  $\Delta greA$  strain. We found that the  $\Delta greA$  strain  
262 only had 12 genes (and six TUs) with increased RpoB occupancy (Dataset S4, Fig. S4). Two of  
263 the six TUs transcribe regulatory RNAs and neither contained significant predicted secondary  
264 structure. These results suggest that unlike Mfd, GreA does not function in releasing RNAP from  
265 sites containing secondary structure. We also observed that in the  $\Delta greA$  strain, a total 469  
266 genes exhibited less than two-fold RpoB occupancy (Dataset S4, Fig. S4). The high number of  
267 genes with decreased RpoB occupancy suggests that GreA functions *in vivo* largely to promote  
268 transcription elongation, which is consistent with prior biochemical studies (36).

269

### 270 **Mfd promotes transcription repression at sites expressing structured, regulatory RNAs**

271 We next tested the effect of Mfd on transcription at sites containing structured RNAs. We began  
272 by performing RNA-seq of WT and  $\Delta mfd$  strains in *B. subtilis*. Consistent with our WT and  $\Delta mfd$

273 RpoB ChIP-seq results, we find more genes were upregulated than downregulated in the *Δmfd*  
274 strain (240 genes upregulated compared to 138 genes downregulated) (Fig. 4A and Dataset  
275 S5). When comparing our RpoB ChIP-seq finding to RNA-seq, we found that of the 116 genes  
276 with greater than 2-fold RpoB ChIP-seq signal in the *Δmfd* strain, 30 of them directly showed  
277 increased expression, while none show decreased expression in the absence of Mfd. Because  
278 standard RNA sequencing protocols are often not suitable for accurate measurement of small  
279 RNAs(37), we wondered if perhaps there were additional genes with increased RpoB density in  
280 the *Δmfd* strain that have corresponding increases in transcription, but were not accurately  
281 detected in our RNA-seq analysis. We therefore directly measured RNA levels using qRT-PCR  
282 at three loci containing non-coding RNAs (the *trnY* locus, *txpa-ratA*, and *bsrH-asBsrH*), all of  
283 which show Mfd binding and increased RpoB signal in the *Δmfd* strain. We found that all three  
284 of these loci have increased gene expression in the *Δmfd* strain compared to WT (Fig. 4B).  
285 These findings suggest that at many sites, Mfd's *in vivo* RNAP release activity directly represses  
286 transcription.

287

### 288 **Transcriptional regulation by Mfd at toxin-antitoxin loci is essential for cell survival**

289 Aside from promoting mutagenesis and evolution, there are not many phenotypic defects that  
290 have been detected in the absence of Mfd, even upon exposure to DNA damage(15, 16, 38–  
291 40). We wondered whether the transcriptional regulation activity of Mfd at regions we detected  
292 were physiologically relevant. We began by focusing on the highest structured regulatory RNAs  
293 which had altered RpoB density in the *Δmfd* strain and were directly bound by Mfd. These  
294 regulatory RNAs were present in two pairs of type I toxin-antitoxin (TA) loci in *B. subtilis*: the  
295 *txpA/ratA* locus and the *bsrH/as-bsrH* locus. Type I TA loci are characterized by the expression  
296 of a small toxic peptide and a noncoding RNA that neutralizes toxin expression by direct binding  
297 and either inhibiting translation or promoting degradation of the toxin mRNA(41). The cellular  
298 functions of type I TA loci remain unclear, but they have been proposed to be important for

299 diverse aspects of physiology, including persister formation(42), biofilm formation(43), and  
300 prophage maintenance(44). Five type I TA loci have been identified in *B. subtilis*(41)- we found  
301 that three of these loci have both Mfd binding and a minimum two-fold increase in RpoB density  
302 in the  $\Delta mfd$  strain, while a fourth locus, *yonT/as-YonT*, showed a significant increase in RpoB  
303 density in the  $\Delta mfd$  strain (Table S3).

304  
305 Transcription regulation at type I TA loci is essential for cell survival, as overexpression of type I  
306 toxins can be lethal(45). We hypothesized that Mfd's regulation of transcription at TA loci was  
307 important for survival. We therefore overexpressed the TxpA toxin under an IPTG (isopropyl b-  
308 D-1-thiogalacto-pyranoside) inducible promoter in both WT and  $\Delta mfd$  strains and performed  
309 cellular viability assays. We found that cells lacking Mfd are highly sensitized to both chronic  
310 (Fig. 5A) and acute (Fig. 5C) overexpression of TxpA. Cells lacking Mfd show up to five orders  
311 of magnitude sensitivity to overexpression of this toxin. Similarly, we overexpressed the BsrH  
312 toxin in WT and  $\Delta mfd$  strains to test whether Mfd's effect was conserved. Indeed, we see  
313 roughly 4 orders of magnitude sensitization of the  $\Delta mfd$  strain with both chronic (Fig. 5B) and  
314 acute (Fig. 5D) overexpression of BsrH. To confirm that this effect was directly due to  
315 overexpression of BsrH or TxpA, we performed qRT-PCR analysis in our WT and  $\Delta mfd$  strains  
316 containing the overexpression constructs. We confirmed that in the TxpA and BsrH  
317 overexpression strains, toxin overexpression was increased by ~3-fold and ~2-fold in the  $\Delta mfd$   
318 strain, respectively (Fig. 5E-F). This finding suggests that Mfd's sensitivity is directly due to toxin  
319 overexpression.

320

## 321 **Discussion**

322 In this work, we unraveled the fundamental importance of Mfd on regulating transcription and  
323 RNAP association at sites of endogenous regions. We found that most sites which share both  
324 Mfd association as well as changes in RpoB levels in the absence of Mfd contain regulatory

325 RNAs. Many of these regulatory RNAs are highly structured. We additionally found that Mfd  
326 plays an essential regulatory role in cellular physiology, at least at toxin-antitoxin loci, which  
327 contain highly structured RNAs. From these findings, we propose that Mfd is a critical RNAP co-  
328 factor, important for regulation of transcription at many chromosomal regions. Regulation by Mfd  
329 at sites containing highly structured RNAs are especially pronounced in our datasets and are  
330 essential at least for homeostasis of TA systems (Fig. 6). Given the known structural and  
331 functional conservation of Mfd(15, 46), it is likely that its role in regulating transcription at highly  
332 structured RNAs is also conserved in other species.

333  
334 Prior work has shown that Mfd can promote transcription termination at significant protein  
335 roadblocks(8, 19, 20, 29, 47, 48). Our findings suggest that Mfd's transcription termination  
336 activity is particularly critical *in vivo* at regions of high RNA secondary structure. While what  
337 induces Mfd association and Mfd's influence on RNAP association at these sites remains  
338 unclear, we do know that RNA secondary structure can regulate RNAP dynamics *in vivo*. For  
339 example, RNAP pausing can be promoted by the formation of stable RNA hairpin structures in  
340 the exit channel of RNAP and inhibit its movement(3, 49–51). Additionally, pausing via RNA  
341 secondary structure can regulate gene expression at riboswitches, can promote coupling of  
342 transcription and translation(52, 53), and is critical for the process of intrinsic transcription  
343 termination in bacteria(10, 54). At certain sites, such pausing may induce RNAP backtracking,  
344 but mechanistic studies suggest that more commonly pausing induces a “half translocated”  
345 state of RNAP(50), which inhibits its immediate processivity (55). It therefore seems plausible  
346 that Mfd is critical for helping promote RNAP release at sites with significant RNAP pausing.  
347 Indeed, other RNAP associated factors, specifically NusA and NusG, are known to alter the  
348 dynamics between RNAP pausing and transcription elongation(56, 57). Although our  
349 experiments do not allow us to identify the precise state of RNAP at sites of Mfd activity *in vivo*,  
350 current models regarding RNAP activity hint at the possibility that Mfd can recognize and act not

351 only on backtracked RNAPs but also on RNAPs that are paused and not fully backtracked, or  
352 perhaps simply decreased in its elongation rate. These mechanisms however are not mutually  
353 exclusive. It is possible that the specific regions where Mfd modulates transcription have  
354 increased RNAP backtracking, however, the results of our GreA experiments are inconsistent  
355 with this model.

356  
357 Given the wide range of biological functions inherent to structured RNAs, the consequences of  
358 Mfd's activity at these sites are likely to be broad ranging. For example, we identified multiple  
359 riboswitches containing TUs which Mfd binds and promotes RNAP release. These TUs are  
360 involved in many critical metabolic processes, ranging from beta-glucoside metabolism (*bgIP-*  
361 *bgIH-yxiE*)(58, 59), to the utilization of glycerol (*glpF-glpK* and *glpT-glpQ*)(60) to purine  
362 metabolism (*purEKBCSQLFMNHD*)(61, 62). We also identified Mfd binding and RNAP release  
363 at a locus containing a long cis-acting antisense RNA (*YabE/S25*) that is thought to play a role  
364 cell wall maintenance (63). Lastly, amongst many other sites, we also identified Mfd binding and  
365 RNAP termination at tRNA loci (the *trnY* locus in *B. subtilis* containing a highly structured RNA  
366 of unknown function). The physiological relevance of Mfd's activity at many of these sites  
367 requires further investigation that is outside of the scope of the current study.

368  
369 Various mechanisms of transcription-associated mutagenesis (TAM) exist(64, 65). Based on our  
370 findings, we propose that the inherent structure of RNA may be an additional novel mechanism  
371 by which transcription promotes mutagenesis, specifically through Mfd. Interestingly, RNA  
372 secondary structure has been reported to enhance mutation rates in replicating retroviruses(66),  
373 suggesting that evolution via secondary structure may be a universal mechanism. Moreover, a  
374 recent study by Thornlow, et al.(67), using computational analyses, revealed that tRNAs have  
375 higher mutation rates relative to other parts of the genome(67). They also suggest that this  
376 phenomenon is linked to transcription. It is therefore quite possible that, at least in bacteria, the

377 evolution of tRNA structures is mediated by Mfd. By promoting DNA mutagenesis at sites of  
378 highly structured RNAs, Mfd may inherently alter the secondary structure encoded at the site of  
379 its activity, leading to novel or altered functions of the RNA.

380

381 Interestingly, Mfd also functions as an evolvability factor in diverse bacterial species, promoting  
382 rapid evolution of antibiotic resistance development(15) as well as stationary-phase  
383 mutagenesis(38, 39). Additionally, non-coding RNAs are well-known to evolve very quickly (68),  
384 however, the mechanisms by which this occurs is unknown. Our results suggest that RNAP  
385 release contributes to the evolution of these regions. While outside the scope of our studies,  
386 addressing this possibility requires further investigations.

387

## 388 **Materials and Methods**

### 389 **Strain constructions**

390 All strains and plasmids used and constructed in this study are listed in Table S4 and primers  
391 used are listed in Table S5. *B. subtilis* stains used in this study were derivatives of the HM1  
392 (JH642) parent strain(69). Transformations into *B. subtilis* HM1 were performed under standard  
393 conditions as previously described(70). Plasmids used in this study were grown in *E. coli* DH5 $\alpha$ .  
394 Plasmids were cloned using chemical transformations of competent *E. coli*. All plasmid  
395 purification was performed by growth of appropriate *E. coli* strain overnight at 37° C in Luria-  
396 Bertani (LB) medium supplemented with the appropriate antibiotic and plasmids were  
397 subsequently purified using the GeneJet Plasmid Miniprep Kit (Thermo). Further details on  
398 strain construction can be found in the SI appendix.

399

### 400 **Growth conditions**

401 For experiments in *B. subtilis*, cultures were grown as described unless otherwise indicated.  
402 Cells were plated on LB supplemented with the appropriate antibiotic for isolation of single

403 colonies. Overnight cultures from single colonies were grown at 37° C in LB at 260 RPMs and  
404 the following day cells were diluted back to OD600 0.05 and grown to exponential phase  
405 (OD600 0.3-0.5) before harvesting. For acute rifampicin ChIP experiments, cultures were grown  
406 in identical fashion until they reach OD600 0.3-0.5 and rifampicin was added at a concentration  
407 of 100µg/mL for 5 minutes before harvesting.

408

#### 409 **ChIP-seq and ChIP-qPCR experiments**

410 For *B. subtilis* Mfd ChIP experiments, c-Myc mouse monoclonal antibody (clone 9E10) was  
411 used (Thermo). For RpoB experiments, RNA polymerase beta mouse monoclonal antibody  
412 (clone 8RB13) was used (Thermo).

413

414 ChIP experiments were performed as previously described(71, 72). Briefly, Cells were grown to  
415 exponential phase as previously described and crosslinked with 1% formaldehyde v/v. After 20  
416 minutes at room temperature, .5M final concentration of glycine was added and cells were  
417 pelleted, washed in cold 1x PBS and pelleted again. Cells were resuspended in solution A (10  
418 mM Tris pH 8.0, 10 mM EDTA, 50 mM NaCl, 20% sucrose) supplemented with 1 mg/ml  
419 lysozyme and 1 mM AEBSF at 37° C for 30 minutes. 2x IP buffer (100 mM Tris pH 7.0, 10 mM  
420 EDTA, 300 mM NaCl, 20% triton x-100), supplemented with 1mM AEBSF, was then added and  
421 lysates were incubated on ice for 30 minutes. Cell lysates were sonicated four times as 30%  
422 amplitude for ten seconds using a Fisher sonic dismembrator (Fisher FB120). Lysates were  
423 centrifuged at 8000 RPMs for 15 minutes at 4° C. The supernatant was transferred into new  
424 microfuge tubes.

425

426 ChIP lysates were split into a total DNA input control (40µl of lysate) and immunoprecipitation  
427 (IP) (1mL of lysate). For Mfd ChIP experiments 12µl anti-c-Myc antibody were added to the IP  
428 samples and 2µl of anti-RpoB antibody was added for RpoB ChIPs. IP lysates were rotated



429 overnight at 4° C. The following day, 30µl Protein A sepharose beads (GE) were added to the IP  
430 samples and rotated for one hour at room temperature. Beads were then pelleted with  
431 centrifugation at 2000 RPMs for one minute. Supernatant was decanted and beads were  
432 subsequently washed six times with 1x IP buffer and one time with 1x TE pH 8.0. Beads were  
433 then pelleted and resuspended in 100µl of elution buffer (50mM Tris pH 8.0, 10mM EDTA), and  
434 1% SDS and incubated at 65° C for 10 minutes. Beads were pelleted by centrifugation and  
435 supernatant was transferred to a new microfuge tube. A second round of elution was performed  
436 by resuspension of beads in 150µl of elution buffer II (10mM Tris pH 8.0, 1 mM EDTA, 0.67%  
437 SDS). Beads were pelleted and supernatant was transferred to microfuge tube containing eluate  
438 from the first elution. IP samples were then incubated overnight at 65° C. The following day,  
439 proteinase K was added at a final concentration 0.4 mg/mL and samples were incubated for two  
440 hours at 37° C. Purification was performed by using the GeneJet PCR Purification Kit (Thermo).

441  
442 Library preparation for ChIP-seq was performed using the Nextera XT DNA Library Prep Kit  
443 (Illumina) according to manufacturer's instructions. For ChIP-quantitative PCR (qPCR), Sso  
444 Advanced Universal SYBR Green Supermix (BioRad) was used according to manufacturer's  
445 instructions.

446

#### 447 **RNA-seq experiments**

448 *B. subtilis* cultures were grown to exponential growth as previously described and harvested by  
449 addition of 1:1 volume 100% cold methanol and centrifugation at 5000 RPMs for five minutes.  
450 Cell pellets were subsequently lysed in TE and lysozyme (20mg/mL) and purified using the  
451 GeneJet RNA Purification Kit (Thermo). Library preparation for RNA-seq was performed using  
452 the Scriptseq Complete Kit (Bacteria) from Illumina, according to manufacturer's instructions.

453

#### 454 **Whole-genome sequencing analysis**

455   ChIP-seq and RNA-seq samples were sequenced using the Illumina Nextseq 500/550  
456   Sequencing system at the University of Washington Northwest Genomics Center and the  
457   VANTAGE Sequencing Core at Vanderbilt University. After sequencing, sample reads from *B.*  
458   *subtilis* were mapped to *B. subtilis* 168 genome (accession number: NC\_000964.3) using  
459   Bowtie2(73). For data visualization, SAMtools was used to process SAM files(74) to produce  
460   wiggle plots(75). Wiggle files from all ChIP samples were normalized to input samples (total  
461   input DNA subtracted from the ChIP signal). For quantification of ChIP-seq and RNA-seq  
462   samples, BAM files were processed by the featureCounts program to determine read counts per  
463   gene(76). To determine differential RNA-seq expression and differential ChIP-seq binding, read  
464   counts were analyzed by DEseq2 software(77). In order to determine correlations between  
465   RpoB ChIP binding and Mfd ChIP, read counts generated by featureCounts were divided by the  
466   total number of sequencing reads per sample. ChIP samples were then divided by input  
467   samples and log<sub>2</sub> normalized.

468

#### 469   **Quantitative RT-PCR assays**

470   For quantification of RNA using qRT-PCR, RNA was extracted as described in the RNA-seq  
471   experiments section. Subsequently, 1µg of total RNA was treated with DNaseI (Thermo) for one  
472   hour at 37° C. DNase denaturation was performed with addition of 10mM EDTA and incubation  
473   at 65° C for 10 minutes. cDNA generation was performed using the iScript Supermix (BioRad),  
474   according to the manufacturer's instructions. Quantitative PCR (qPCR) was performed using the  
475   Sso Advanced Universal SYBR Green Supermix (BioRad), according to manufacturer's  
476   instructions. For normalization of qRT-PCR, primers to *B. subtilis* rRNA was used.

477

#### 478   **Cell survival assays**

479   For chronic survival assays, strains were struck out on LB agar plates and *B. subtilis* cultures  
480   were grown in 2mL LB until they reached an OD600 of 0.5-1.0. All cultures were normalized to

481 OD600 0.3 and serial dilutions were performed in 1x Spizizen's salts. 5µl of cells were plated on  
482 control plates containing LB agar only and LB agar plates containing the designated  
483 concentration of IPTG (see figure legends for concentrations). Plates were grown at 30° C  
484 overnight and CFUs were enumerated the following day.

485  
486 For acute survival assays, cultures were grown in 2ml until they reached an OD600 of 0.5-1.0  
487 and then diluted back to OD600 0.05. Either was 1mM or .1 mM IPTG was then added and cells  
488 were grown for approximately 60 minutes (OD600~.3). Cells were subsequently washed two  
489 times with 1x Spizizen's salts to remove residual IPTG and were serially diluted. 5µl of cells  
490 were plated on LB agar and plates were grown at 30° C overnight for CFU enumeration. For  
491 both chronic and acute survival assays, images were taken using the BioRad Gel Doc XR+  
492 Molecular Imager.

493

#### 494 **Acknowledgements**

495 We thank Patrick Nugent and Ankunda Kariisa for assistance with strain construction and  
496 bacterial 2-hybrid assays. We also thank Charlie Lee from the Shendure Lab at the University of  
497 Washington as well as the VANTAGE genomics core at Vanderbilt for assistance with genome  
498 sequencing experiments. We also thank Chris Merrikh and Kevin Lang for helpful scientific  
499 discussions. This work was supported by the National Institute of Allergy and Infectious  
500 Diseases R01 AI127422.

501

#### 502 **Footnotes**

503 Author contributions: M.N.R. and H.M. conceived of and designed experiments. M.N.R.  
504 performed experiments. M.N.R. and H.M. analyzed data and wrote the paper.

505

506 To whom the correspondence should be addressed. Email: [houra.merrikh@vanderbilt.edu](mailto:houra.merrikh@vanderbilt.edu)

507

508 The authors declare no conflict of interest

509

## 510 **References**

- 511 1. I. Artsimovitch, R. Landick, Pausing by bacterial RNA polymerase is mediated by  
512 mechanistically distinct classes of signals. *Proc. Natl. Acad. Sci.* **97**, 7090–7095 (2000).
- 513 2. A. Mayer, H. M. Landry, L. S. Churchman, Pause & go: from the discovery of RNA  
514 polymerase pausing to its functional implications. *Curr. Opin. Cell Biol.* **46**, 72–80 (2017).
- 515 3. C. L. Chan, D. Wang, R. Landick, Multiple interactions stabilize a single paused  
516 transcription intermediate in which hairpin to 3' end spacing distinguishes pause and  
517 termination pathways. *J. Mol. Biol.* **268**, 54–68 (1997).
- 518 4. D. A. Erie, The many conformational states of RNA polymerase elongation complexes  
519 and their roles in the regulation of transcription. *Biochim. Biophys. Acta* **1577**, 224–239  
520 (2002).
- 521 5. A. C. M. Cheung, P. Cramer, Structural basis of RNA polymerase II backtracking, arrest  
522 and reactivation. *Nature* **471**, 249–253 (2011).
- 523 6. E. Nudler, A. Mustaev, E. Lukhtanov, A. Goldfarb, The RNA–DNA Hybrid Maintains the  
524 Register of Transcription by Preventing Backtracking of RNA Polymerase. *Cell* **89**, 33–41  
525 (1997).
- 526 7. E. Nudler, RNA Polymerase Backtracking in Gene Regulation and Genome Instability.  
527 *Cell* **149**, 1438–1445 (2012).
- 528 8. D. Dutta, K. Shatalin, V. Epshtein, M. E. Gottesman, E. Nudler, Linking RNA polymerase  
529 backtracking to genome instability in *E. coli*. *Cell* **146**, 533–543 (2011).

- 530 9. J. Park, M. T. Marr, J. W. Roberts, E. coli Transcription Repair Coupling Factor (Mfd  
531 Protein) Rescues Arrested Complexes by Promoting Forward Translocation. *Cell* **109**,  
532 757–767 (2002).
- 533 10. J.-S. Park, J. W. Roberts, Role of DNA bubble rewinding in enzymatic transcription  
534 termination. *Proc. Natl. Acad. Sci.* **103**, 4870–4875 (2006).
- 535 11. I. Mellon, G. Spivak, P. C. Hanawalt, Selective removal of transcription-blocking DNA  
536 damage from the transcribed strand of the mammalian DHFR gene. *Cell* **51**, 241–249  
537 (1987).
- 538 12. C. Selby, A. Sancar, Molecular mechanism of transcription-repair coupling. *Science* (80-  
539 ). **260**, 53 (1993).
- 540 13. Christopher P. Selby, Mfd Protein and Transcription-Repair Coupling in E. coli.  
541 *Photochem Photobiol.* **93**, 280–295 (2017).
- 542 14. P. C. Hanawalt, G. Spivak, Transcription-coupled DNA repair: two decades of progress  
543 and surprises. *Nat. Rev. Mol. Cell Biol.* **9**, 958–70 (2008).
- 544 15. M. N. Ragheb, *et al.*, Inhibiting the Evolution of Antibiotic Resistance. *Mol. Cell* **73**, 157-  
545 165.e5 (2019).
- 546 16. V. Kamarthapu, *et al.*, ppGpp couples transcription to DNA repair in E.coli. *Science* (80-  
547 ). (2016) <https://doi.org/10.1126/science.aad6945>.
- 548 17. V. Epshtein, *et al.*, UvrD facilitates DNA repair by pulling RNA polymerase backwards.  
549 *Nature* **505**, 372–377 (2014).
- 550 18. S. E. Cohen, *et al.*, Roles for the transcription elongation factor NusA in both DNA repair  
551 and damage tolerance pathways in Escherichia coli. *Proc. Natl. Acad. Sci.* **107**, 15517–  
552 15522 (2010).

- 553 19. J. M. Zalieckas, L. V Wray, A. E. Ferson, S. H. Fisher, Transcription–repair coupling  
554 factor is involved in carbon catabolite repression of the *Bacillus subtilis* hut and gnt  
555 operons. *Mol. Microbiol.* **27**, 1031–1038 (1998).
- 556 20. J. M. Zalieckas, L. V Wray, S. H. Fisher, Expression of the *Bacillus subtilis* acsA gene:  
557 position and sequence context affect cre-mediated carbon catabolite repression. *J.*  
558 *Bacteriol.* **180**, 6649–54 (1998).
- 559 21. T. T. Le, *et al.*, Mfd Dynamically Regulates Transcription via a Release and Catch-Up  
560 Mechanism. *Cell* **173**, 1823 (2018).
- 561 22. H. N. Ho, A. M. van Oijen, H. Ghodke, The transcription-repair coupling factor Mfd  
562 associates with RNA polymerase in the absence of exogenous damage. *Nat. Commun.*  
563 **9**, 1–12 (2018).
- 564 23. A. M. Deaconescu, *et al.*, Structural Basis for Bacterial Transcription-Coupled DNA  
565 Repair. *Cell*, 507–520 (2006).
- 566 24. A. L. Chambers, A. J. Smith, N. J. Savery, A DNA translocation motif in the bacterial  
567 transcription-repair coupling factor, Mfd. *Nucleic Acids Res.* **31** (2003).
- 568 25. A. J. Smith, N. J. Savery, RNA polymerase mutants defective in the initiation of  
569 transcription-coupled DNA repair. *Nucleic Acids Res.* **33**, 755–764 (2005).
- 570 26. W. R. McClure, C. L. Cech, On the mechanism of rifampicin inhibition of RNA synthesis.  
571 *J. Biol. Chem.* **253**, 8949–8956 (1978).
- 572 27. E. A. Campbell, *et al.*, Structural mechanism for rifampicin inhibition of bacterial RNA  
573 polymerase. *Cell* **104**, 901–912 (2001).
- 574 28. P. Nicolas, *et al.*, Condition-dependent transcriptome reveals high-level regulatory  
575 architecture in *Bacillus subtilis*. *Science* **335**, 1103–6 (2012).

- 576 29. R. S. Washburn, Y. Wang, M. E. Gottesman, Role of E .coli Transcription-Repair  
577 Coupling Factor Mfd in Nun-mediated Transcription Termination. *J. Mol. Biol.* **2836**, 655–  
578 662 (2003).
- 579 30. R. A. T. Mars, P. Nicolas, E. L. Denham, J. M. van Dijl, Regulatory RNAs in Bacillus  
580 subtilis: a Gram-Positive Perspective on Bacterial RNA-Mediated Regulation of Gene  
581 Expression. *Microbiol. Mol. Biol. Rev.* **80**, 1029–1057 (2016).
- 582 31. A. Ray-Soni, M. J. Bellecourt, R. Landick, Mechanisms of Bacterial Transcription  
583 Termination: All Good Things Must End. *Annu. Rev. Biochem.* **85**, 319–347 (2016).
- 584 32. I. Gusarov, E. Nudler, The mechanism of intrinsic transcription termination. *Mol. Cell* **3**,  
585 495–504 (1999).
- 586 33. A. Weixlbaumer, K. Leon, R. Landick, S. A. Darst, Structural basis of transcriptional  
587 pausing in bacteria. *Cell* **152**, 431–441 (2013).
- 588 34. S. Y. Le, J. V Maizel, A method for assessing the statistical significance of RNA folding. *J.*  
589 *Theor. Biol.* **138**, 495–510 (1989).
- 590 35. E. Freyhult, P. P. Gardner, V. Moulton, A comparison of RNA folding measures. *BMC*  
591 *Bioinformatics* **6**, 241 (2005).
- 592 36. S. Borukhov, A. Polyakov, V. Nikiforov, A. Goldfarb, GreA protein: A transcription  
593 elongation factor from Escherichia coli. *Proc. Natl. Acad. Sci.* **89**, 8899–8902 (1992).
- 594 37. F. Ozsolak, P. M. Milos, RNA sequencing: advances, challenges and opportunities. *Nat.*  
595 *Rev. Genet.* **12**, 87–98 (2011).
- 596 38. H. A. Martin, M. Pedraza-reyes, R. E. Yasbin, E. A. Robleto, Transcriptional De-  
597 Repression and Mfd Are Mutagenic in Stressed Bacillus subtilis Cells. *J Mol Microbiol*  
598 *Biotechnol* **21**, 45–58 (2011).

- 599 39. C. Ross, *et al.*, Novel Role of *mfd* : Effects on Stationary-Phase Mutagenesis in *Bacillus*  
600 *subtilis*. *J. Bacteriol.* **188**, 7512–7520 (2006).
- 601 40. S. Million-Weaver, *et al.*, An underlying mechanism for the increased mutagenesis of  
602 lagging-strand genes in *Bacillus subtilis*. *Proc. Natl. Acad. Sci. U. S. A.* **112**, E1096-105  
603 (2015).
- 604 41. S. Brantl, N. Jahn, SRNAs in bacterial type I and type III toxin-antitoxin systems. *FEMS*  
605 *Microbiol. Rev.* **39**, 413–427 (2015).
- 606 42. T. Dörr, M. Vulić, K. Lewis, Ciprofloxacin Causes Persister Formation by Inducing the  
607 TisB toxin in *Escherichia coli*. *PLoS Biol.* **8**, e1000317 (2010).
- 608 43. J. Domka, J. Lee, T. Bansal, T. K. Wood, Temporal gene-expression in *Escherichia coli*  
609 K-12 biofilms. *Environ. Microbiol.* **9**, 332–346 (2007).
- 610 44. S. Durand, N. Jahn, C. Condon, S. Brantl, Type i toxin-antitoxin systems in *Bacillus*  
611 *subtilis*. *RNA Biol.* **9**, 1491–1497 (2012).
- 612 45. J. M. Silvaggi, J. B. Perkins, R. Losick, Small Untranslated RNA Antitoxin in *Bacillus*  
613 *subtilis*. *J. Bacteriol.* **187**, 6641–6650 (2005).
- 614 46. M. Ragheb, H. Merrikh, The enigmatic role of *Mfd* in replication-transcription conflicts in  
615 bacteria. *DNA Repair (Amst)*. **81** (2019).
- 616 47. C. P. Selby, A. Sancar, Transcription-repair coupling and mutation frequency decline.  
617 *Microbiol. Rev.* **175**, 7509–7514 (1993).
- 618 48. S. C. Hung, M. E. Gottesman, Phage HK022 Nun Protein Arrests Transcription on Phage  
619 lambda DNA in vitro and Competes with the Phage lambda N Antitermination Protein. *J.*  
620 *Mol. Biol.*, 428–442 (1995).



- 621 49. J. Y. Kang, *et al.*, RNA Polymerase Accommodates a Pause RNA Hairpin by Global  
622 Conformational Rearrangements that Prolong Pausing. *Mol. Cell* **69**, 802-815.e1 (2018).
- 623 50. M. L. Kireeva, M. Kashlev, Mechanism of sequence-specific pausing of bacterial RNA  
624 polymerase. *Proc. Natl. Acad. Sci.* **106**, 8900–8905 (2009).
- 625 51. V. R. Tadigotla, *et al.*, Thermodynamic and kinetic modeling of transcriptional pausing.  
626 *Proc. Natl. Acad. Sci.* **103**, 4439–4444 (2006).
- 627 52. M. E. Winkler, C. Yanofsky, Pausing of RNA polymerase during in vitro transcription of  
628 the tryptophan operon leader region. *Biochemistry* **20**, 3738–44 (1981).
- 629 53. A. V. Yakhnin, H. Yakhnin, P. Babitzke, RNA Polymerase Pausing Regulates Translation  
630 Initiation by Providing Additional Time for TRAP-RNA Interaction. *Mol. Cell* **24**, 547–557  
631 (2006).
- 632 54. A. Ray-Soni, R. A. Mooney, R. Landick, Trigger loop dynamics can explain stimulation of  
633 intrinsic termination by bacterial RNA polymerase without terminator hairpin contact.  
634 *Proc. Natl. Acad. Sci.* **114**, E9233–E9242 (2017).
- 635 55. J. Saba, *et al.*, The elemental mechanism of transcriptional pausing. *Elife* **8** (2019).
- 636 56. M. Turtola, G. A. Belogurov, NusG inhibits RNA polymerase backtracking by stabilizing  
637 the minimal transcription bubble. *Elife* **5**, 1–27 (2016).
- 638 57. M. Strauß, *et al.*, Transcription is regulated by NusA:NusG interaction. *Nucleic Acids Res.*  
639 **44**, 5971–5982 (2016).
- 640 58. S. Krüger, S. Gertz, M. Hecker, Transcriptional analysis of bgIPH expression in *Bacillus*  
641 *subtilis*: Evidence for two distinct pathways mediating carbon catabolite repression. *J.*  
642 *Bacteriol.* **178**, 2637–2644 (1996).

- 643 59. I. Irnov, C. M. Sharma, J. Vogel, W. C. Winkler, Identification of regulatory RNAs in  
644 *Bacillus subtilis*. *Nucleic Acids Res.* **38**, 6637–6651 (2010).
- 645 60. R.-P. Nilsson, L. Beijer, B. Rutberg, The glpT and glpQ genes of the glycerol regulon in  
646 *Bacillus subtilis*. *Microbiology* **140**, 723–730 (1994).
- 647 61. M. Mandal, B. Boese, J. E. Barrick, W. C. Winkler, R. R. Breaker, Riboswitches Control  
648 Fundamental Biochemical Pathways in *Bacillus subtilis* and Other Bacteria. *Cell* **113**,  
649 577–586 (2003).
- 650 62. D. J. Ebbole, H. Zalkin, Cloning and characterization of a 12-gene cluster from *Bacillus*  
651 *subtilis* encoding nine enzymes for de novo purine nucleotide synthesis. *J. Biol. Chem.*  
652 **262**, 8274–8287 (1987).
- 653 63. W. Eiamphungporn, J. D. Helmann, Extracytoplasmic Function  $\sigma$  Factors Regulate  
654 Expression of the *Bacillus subtilis* yabE Gene via a cis-Acting Antisense RNA. *J.*  
655 *Bacteriol.* **191**, 1101–1105 (2009).
- 656 64. S. Jinks-Robertson, A. S. Bhagwat, Transcription-Associated Mutagenesis. *Annu. Rev.*  
657 *Genet.* **48**, 341–359 (2014).
- 658 65. N. Kim, S. Jinks-Robertson, Transcription as a source of genome instability. *Nat. Rev.*  
659 *Genet.* **13**, 204–214 (2012).
- 660 66. V. K. Pathakt, H. M. Temin, 5-Azacytidine and RNA Secondary Structure Increase the  
661 Retrovirus Mutation Rate. *J. Virol.* **66**, 3093–3100 (1992).
- 662 67. T. M. Lowe, *et al.*, Transfer RNA genes experience exceptionally elevated mutation rates.  
663 *Proc. Natl. Acad. Sci.* **115**, 8996–9001 (2018).
- 664 68. H. A. Dutcher, R. Raghavan, Origin, Evolution, and Loss of Bacterial Small RNAs.  
665 *Microbiol. Spectr.* **6** (2018).

- 666 69. S. P. Brehm, S. P. Staal, J. A. Hoch, Phenotypes of pleiotropic-negative sporulation  
667 mutants of *Bacillus subtilis*. *J. Bacteriol.* **115**, 1063–70 (1973).
- 668 70. C. . Harwood, S. M. Cutting, J. Wiley, *Molecular Biological Methods for Bacillus* (1990)  
669 (April 11, 2019).
- 670 71. K. S. Lang, *et al.*, Replication-Transcription Conflicts Generate R-Loops that Orchestrate  
671 Bacterial Stress Survival. *Cell* **170**, 787-790.e18 (2017).
- 672 72. H. Merrikh, C. Machón, W. H. Grainger, A. D. Grossman, P. Soultanas, Co-directional  
673 replication-transcription conflicts lead to replication restart. *Nature* **470**, 554–7 (2011).
- 674 73. B. Langmead, S. L. Salzberg, Fast gapped-read alignment with Bowtie 2. *Nat. Methods* **9**,  
675 357–359 (2012).
- 676 74. H. Li, *et al.*, The Sequence Alignment/Map format and SAMtools. *Bioinformatics* **25**,  
677 2078–2079 (2009).
- 678 75. O. R. Homann, A. D. Johnson, MochiView: versatile software for genome browsing and  
679 DNA motif analysis. *BMC Biol.* **8**, 49 (2010).
- 680 76. Y. Liao, G. K. Smyth, W. Shi, featureCounts: an efficient general purpose program for  
681 assigning sequence reads to genomic features. *Bioinformatics* **30**, 923–930 (2014).
- 682 77. M. I. Love, W. Huber, S. Anders, Moderated estimation of fold change and dispersion for  
683 RNA-seq data with DESeq2. *Genome Biol.* **15**, 550 (2014).
- 684 78. A. Conesa, *et al.*, A survey of best practices for RNA-seq data analysis. *Genome Biol.* **17**,  
685 13 (2016).

686

687

688 **Figure Titles and Legends**

689 **Fig. 1. Mfd functions as an RNAP co-factor and requires transcription elongation for**  
690 **association with DNA**

691 (A) ChIP-seq plot of *B. subtilis* Mfd tagged with 1x myc (red) and of WT *B. subtilis* (light green)  
692 using myc antibody. (B) ChIP-seq plot of WT *B. subtilis* RpoB. (C) ChIP-seq plot of *B. subtilis*  
693 MfdL522A-myc point mutant. (D) *B. subtilis* Mfd-myc treated with 50µg/mL of rifampicin for five  
694 minutes. Plots are normalized to total DNA input controls and are the average of at least two  
695 independent experiments.

696 **Fig. 2. Mfd directly promotes release of RNAP *in vivo***

697 (A) RpoB ChIP-seq plots showing regions of RpoB enrichment in  $\Delta mfd$ . Top half of graph (read  
698 counts in red) reflects normalized RpoB ChIP-seq read counts where *B. subtilis*  $\Delta mfd$  had  
699 increased signal relative to WT. Bottom half of graph (read counts in green) reflects RpoB ChIP-  
700 seq read counts where  $\Delta mfd$  had decreased signal relative to WT *B. subtilis*. High background  
701 signal from ribosomal RNA was removed from plots for better visualization. Zoomed in plots are  
702 representative regions of high RpoB enrichment in  $\Delta mfd$ . (B) Scatter plot of WT and  $\Delta mfd$  RpoB  
703 ChIP-seq measuring signal at each gene in *B. subtilis*. For quantification of ChIP signal at each  
704 gene, read counts for each gene were normalized to total library counts and IP samples were  
705 normalized to total DNA input to calculate an IP/Total DNA ratio. Ratios were log<sub>2</sub> normalized  
706 and averaged over at least two independent experiments. Data points above and below colored  
707 shading indicate greater than two-fold increase and decrease in RpoB signal in the  $\Delta mfd$  strain,  
708 respectively. Data points in red indicate genes bound by Mfd. Binding is defined as one  
709 standard deviation greater than the average ChIP signal across all genes in *B. subtilis*.  
710 Calculation of Mfd binding at each gene was determined as described for RpoB ChIP samples.

711 **Fig. 3. Transcription units with Mfd binding and increased RNAP density in  $\Delta mfd$  are**  
712 **enriched for structured regulatory RNAs**

713 Scatter plot of the minimum free energy (MFE) Z-score for regulatory RNAs in *B. subtilis*. Data  
714 points represent regulatory RNAs within TUs that have no observed change in RpoB density  
715 between WT and  $\Delta mfd$  (grey data points), increased RpoB density in  $\Delta mfd$  and bound by Mfd  
716 (red data points), and decreased RpoB density in  $\Delta mfd$  (black data points). Error bars represent  
717 the standard error of the mean (SEM). Statistical significance was determined using two-tailed  
718 Z-test for two population means (\*\*\*\* $p < 0.0001$ ).

719 **Fig. 4. Mfd promotes repression of transcription at sites of structured sRNAs**

720 (A) Scatter plot of RNA-seq. Data points represent the expression level of each gene in *B.*  
721 *subtilis* in WT and  $\Delta mfd$  strains. Scatter plot represents expression level calculated using read  
722 per kilobase per million reads (RPKM)(78), from at least two independent experiments. Data  
723 points in red indicate genes with increased RpoB occupancy in  $\Delta mfd$ . (B) qRT-PCR analysis of  
724 three regions with increased RNAP occupancy in  $\Delta mfd$  *txpA/ratA* (left), *bsrH/as-bsrH* (middle),  
725 and the *trnY* locus (right). RNA values normalized to ribosomal RNA. Error bars represent the  
726 SEM from at least two different experiments. Statistical significance was determined using a  
727 two-tailed Student's T-test (\*\*\*\* $p < 0.0001$ ).

728 **Fig. 5. Transcriptional regulation by Mfd at toxin-antitoxin loci is essential for cell**  
729 **survival**

730 Survival assays under chronic (A) and acute (C) overexpression of TxpA toxin in WT and  $\Delta mfd$   
731 and survival assays under chronic (B) and acute (D) overexpression of BsrH toxin in WT and  
732  $\Delta mfd$ . For all figures, representative images shown above, and quantification of data shown  
733 below. Error bars represent the SEM from at least three independent experiments. (E and F)  
734 qRT-PCR analysis of *txpA* and *bsrH* overexpression in WT and  $\Delta mfd$  strains. RNA values  
735 normalized to ribosomal RNA. Error bars represent the SEM from at least two independent  
736 experiments. Statistical significance was determined using a two-tailed Student's T-test  
737 (\* $p < 0.05$ , \*\* $p < 0.01$ , \*\*\* $p < 0.001$ ).

738 **Fig. 6. Model of Mfd activity at structured regulatory RNAs**

739 During transcription, elongating RNAP (shown in green) transcribed a highly structured RNA  
740 sequence (shown in red). This can arrest RNAP (shown in maroon) on DNA. Bottom left- the  
741 arrested complex is recognized by Mfd (shown in purple), which releases RNAP from the  
742 template and in doing so represses transcription and promotes mutagenesis (shown as yellow  
743 stars on DNA). Bottom right- in the absence of Mfd, RNAP resumes transcription, leading to  
744 higher levels of RNA and decreased mutagenesis.

745 **Tables**

746 **Table 1.** Summary list of genes and previously defined TUs bound with changes in RpoB  
747 density in  $\Delta mfd$  from ChIP-seq analysis. Changes in RpoB density and Mfd binding at TUs are  
748 defined by changes in one or more genes corresponding to its associated TUs

749

|                                         | <b>Decreased RpoB density in<br/><i><math>\Delta mfd</math></i></b> | <b>Increased RpoB density in<br/><i><math>\Delta mfd</math></i></b> |
|-----------------------------------------|---------------------------------------------------------------------|---------------------------------------------------------------------|
| <b>Genes (and TUs)</b>                  | 116 (71)                                                            | 53 (31)                                                             |
| <b>Genes (and TUs) bound<br/>by Mfd</b> | 52 (35)                                                             | 0 (0)                                                               |

750

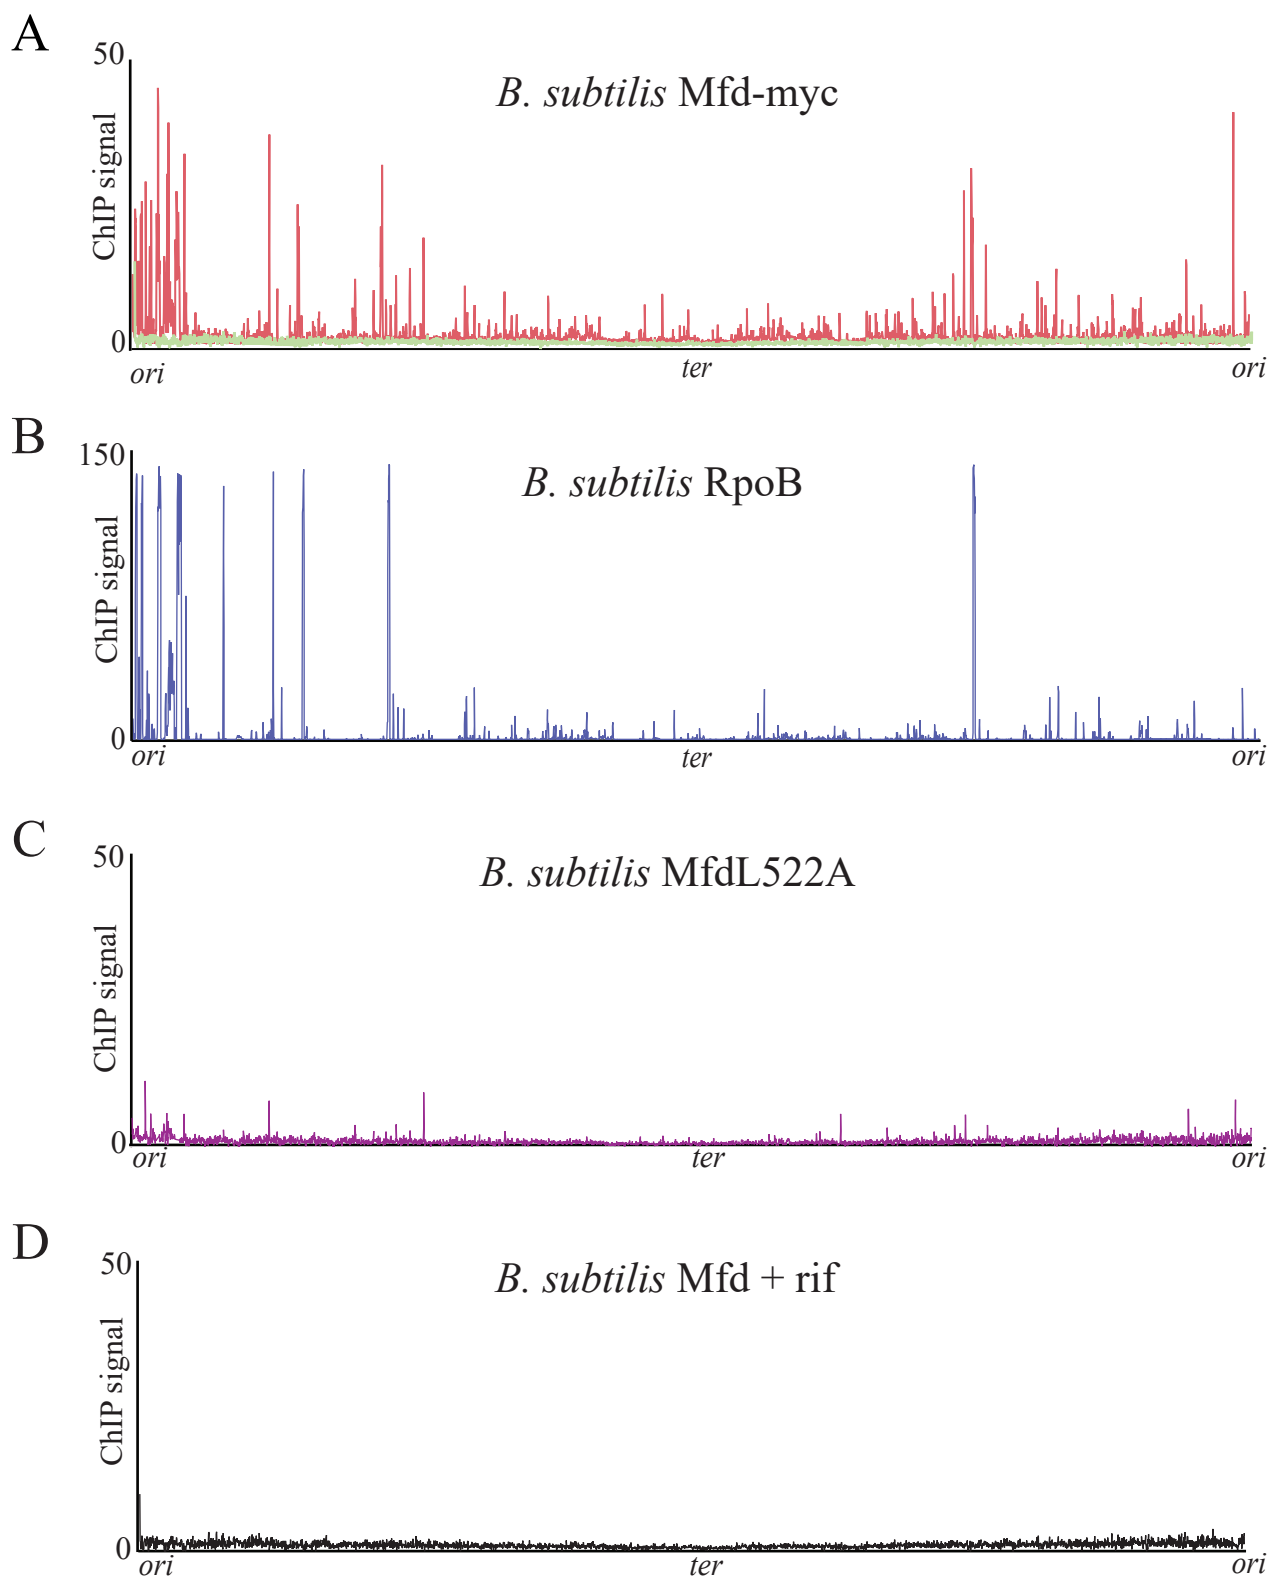

# Fig. 2

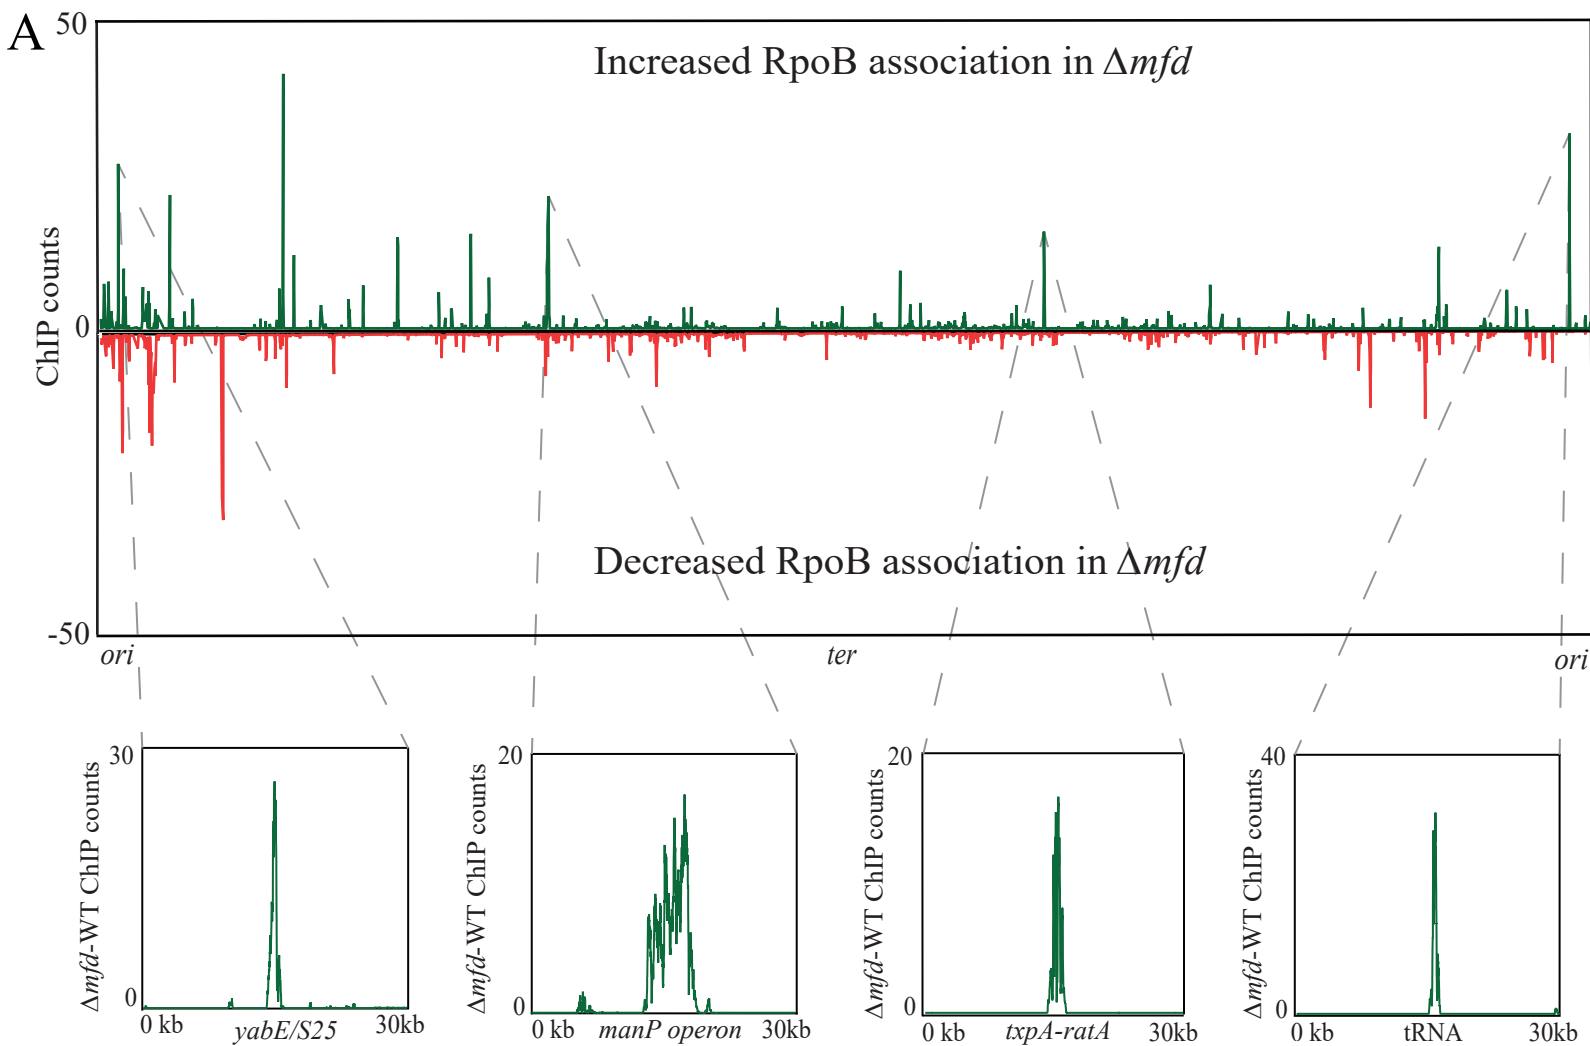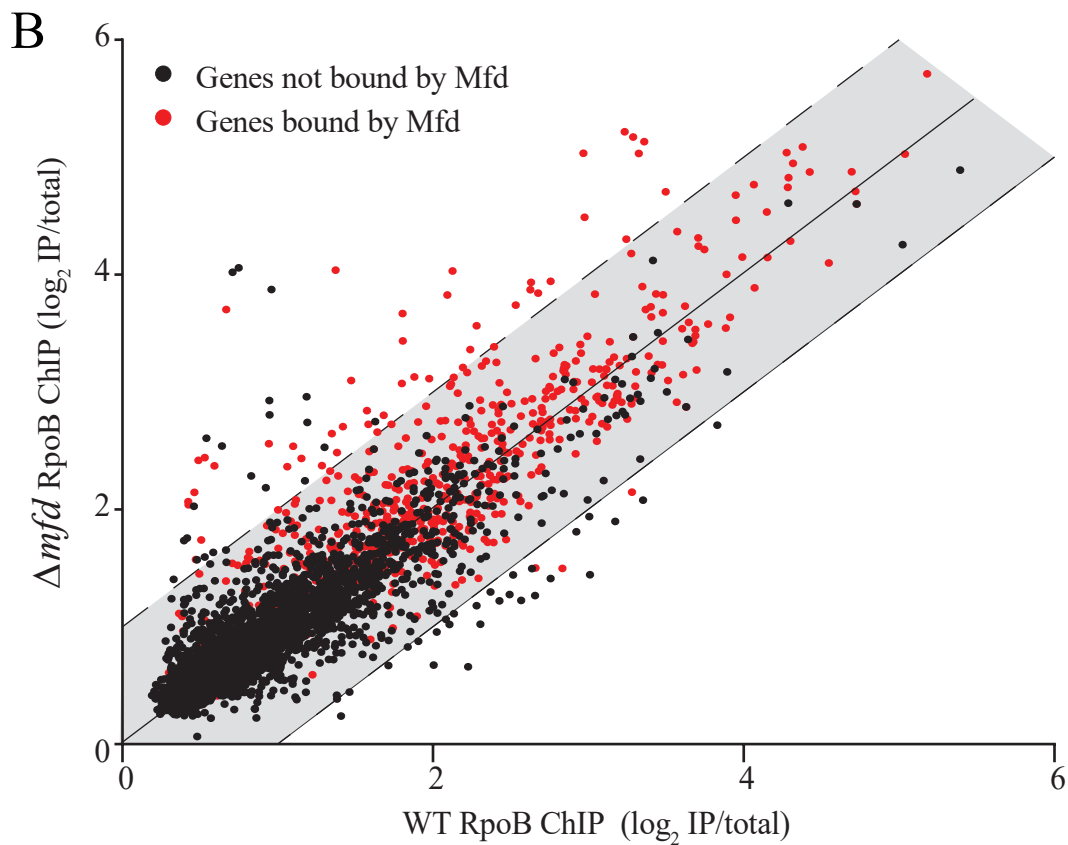



# Fig. 3

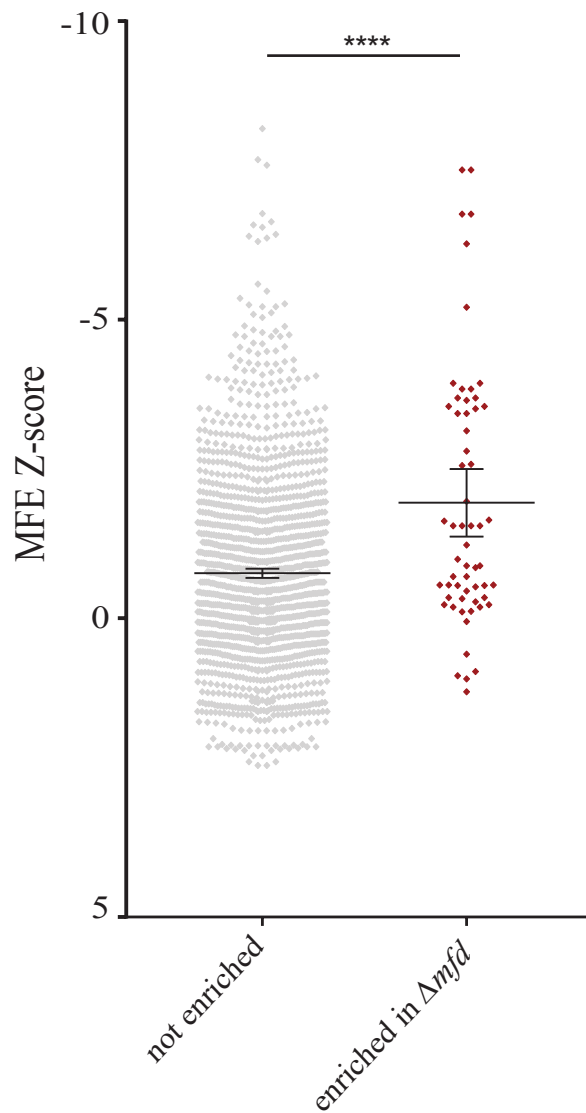

# Fig. 4

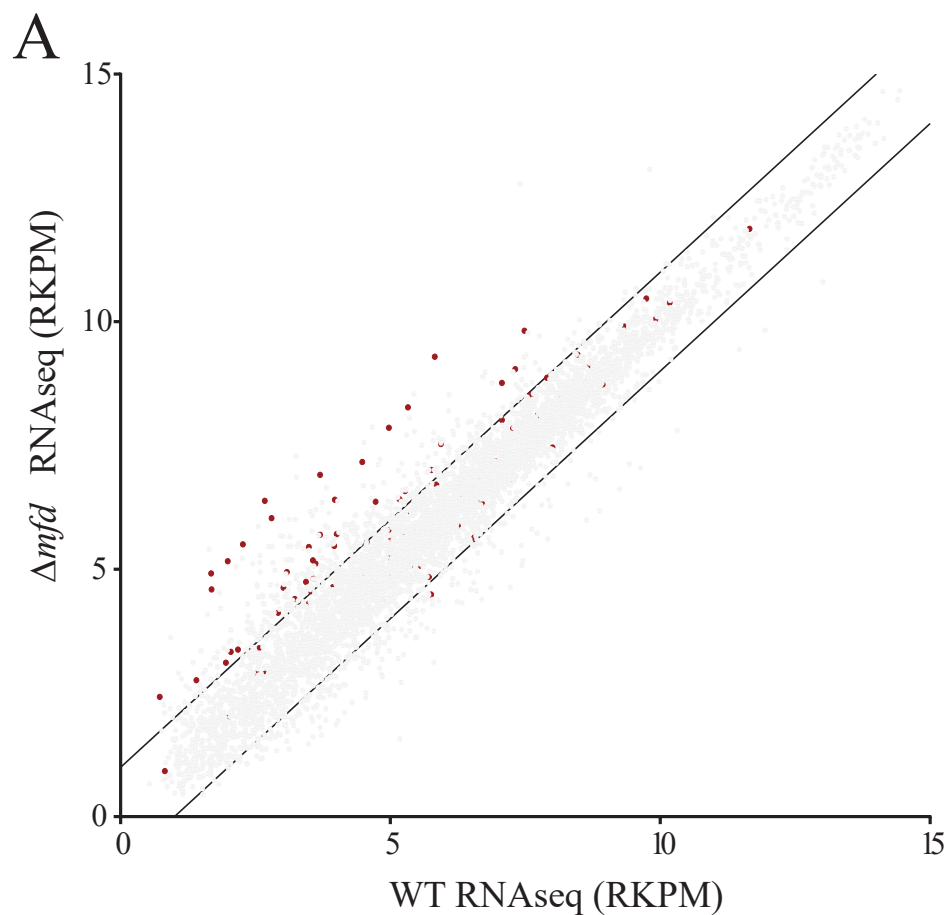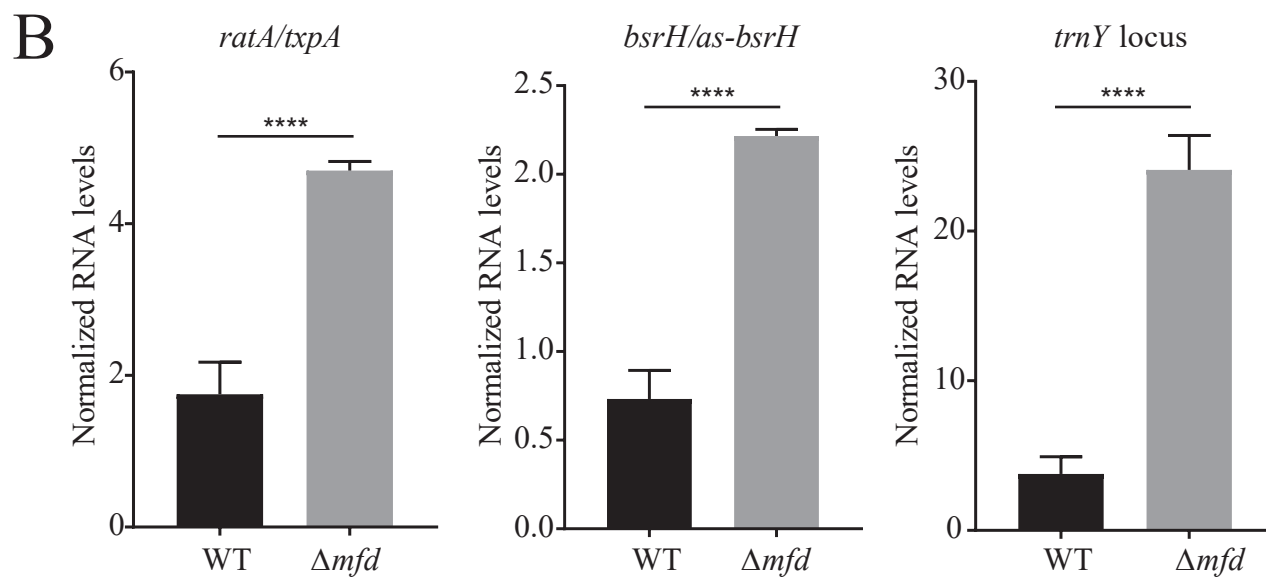

# Fig. 5

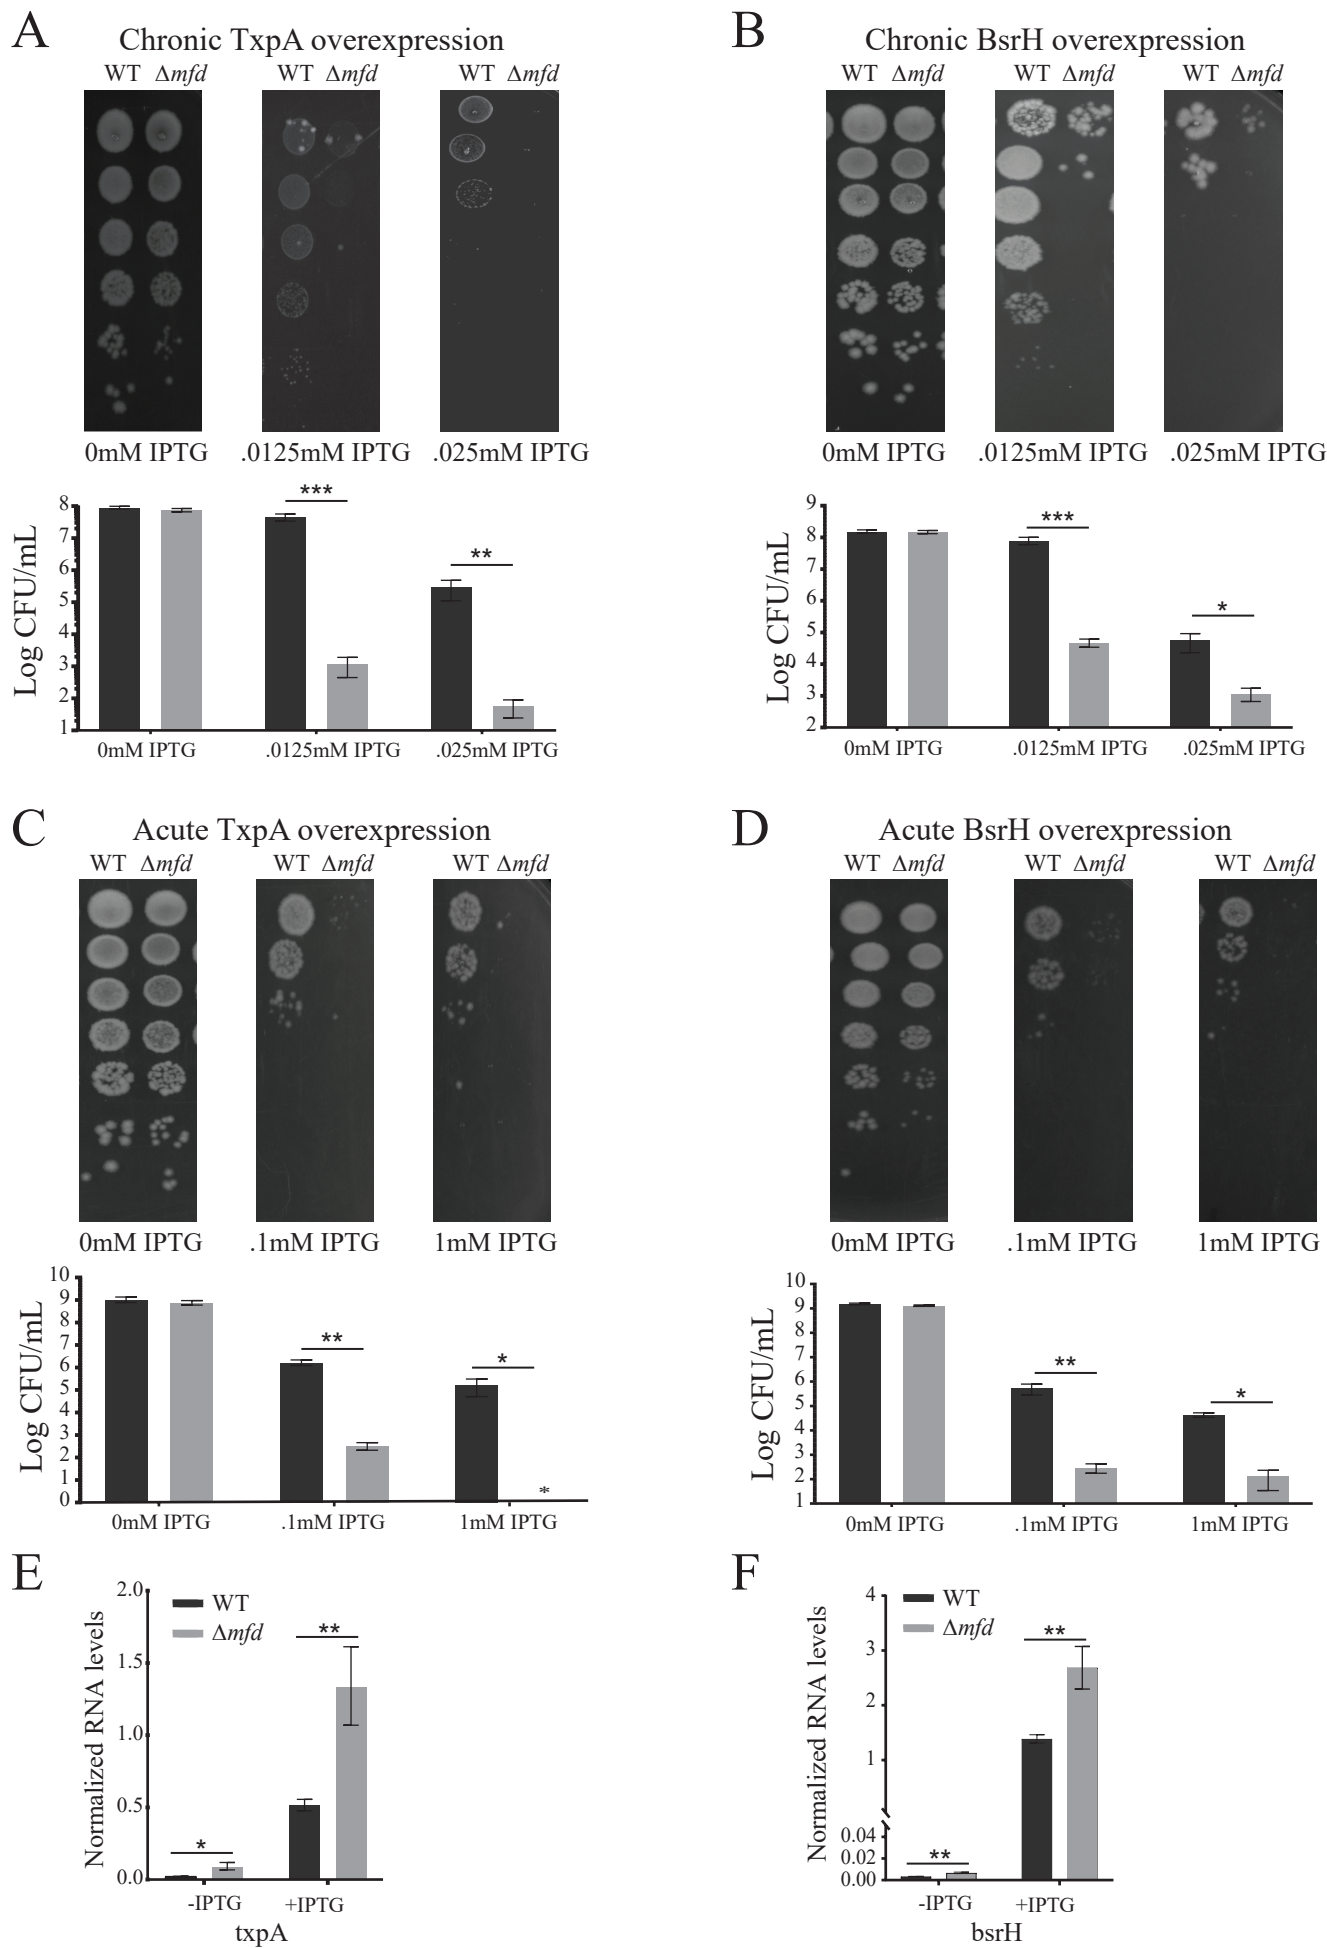

# Fig. 6

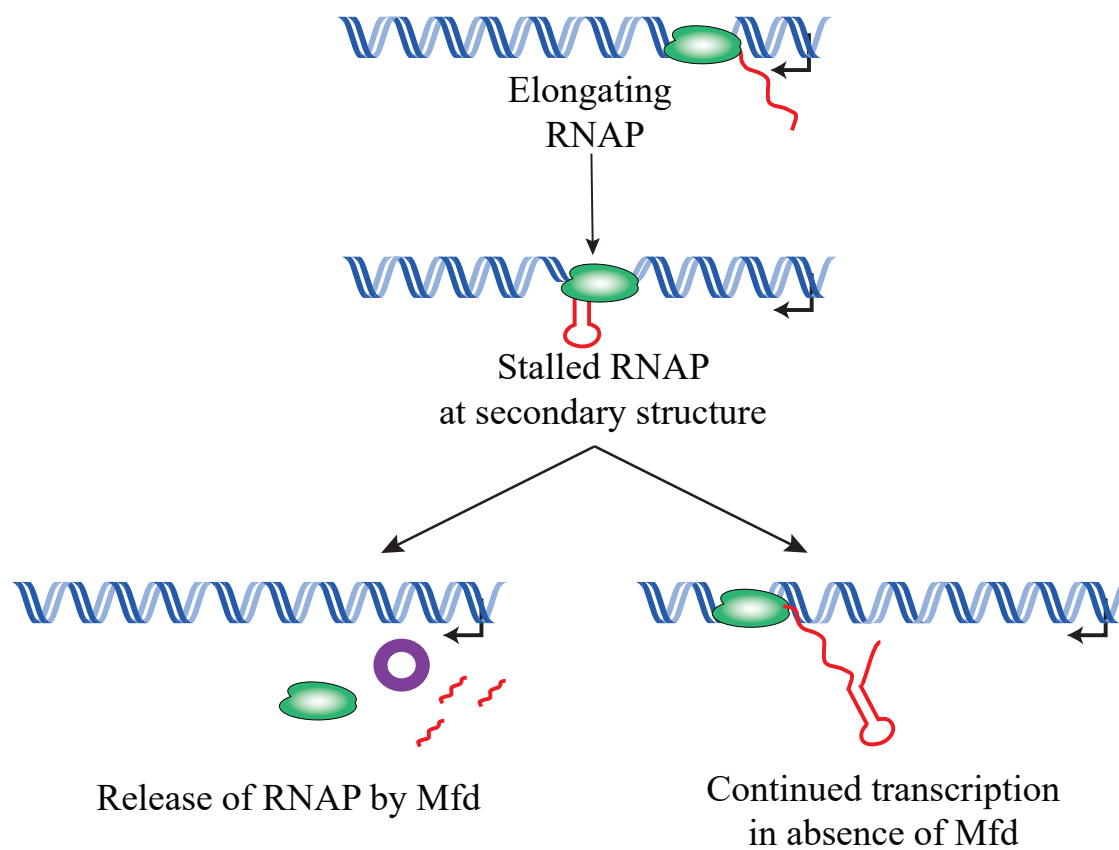

Supplementary Information for:

## Genome-wide association and function studies identify Mfd as a critical RNA polymerase co-factor at hard-to-transcribe regions

Mark Ragheb, Houra Merrikh

Corresponding author: Houra Merrikh  
Email: [houra.merrikh@Vanderbilt.edu](mailto:houra.merrikh@Vanderbilt.edu)

### **This PDF file includes:**

- Expanded Materials and Methods
- Figures S1 to S4
- Tables S1 to S5
- Legends for Datasets S1 to S5
- SI References

## Expanded Materials and Methods

### Detailed strain construction

In order to construct marker-less point mutations of Mfd in *B. subtilis*, the pminiMAD2 plasmid was used as previously described (1). Briefly, HM2916 was constructed by transforming pHM707 into HM1, respectively and grown at in LB broth containing MLS antibiotics at 22°C, the permissive temperature. *B. subtilis* strains were then subsequently incubated for 12 hours at 42°C while maintaining MLS selection. Cells were then serially diluted and passaged multiple times at 22°C. Individual colonies were then plated on LB plates with or without MLS to identify colonies which were MLS sensitive and had evicted the plasmid.

HM2769 was constructed by transforming pHM430 and pHM439 into HM2747. HM2771 was constructed by transforming pHM430 and pBR $\alpha$  into HM2747. HM2773 was constructed by transforming pHM439 and pAC $\lambda$ CI into HM2747. HM2965 was constructed by transforming pHM441 and pHM439 into HM2747. HM2932 was constructed by transforming the HM2916 plasmid into HM1.

HM3157 was constructed using the transformation of SOE PCR product into HM1. First, Mfd-myc amplicon was generated using primers HM3759 and HM3760 and HM1 genomic DNA as a template in order to add a 1x myc sequence to the 3' end of the Mfd gene. Erm resistance cassette was amplified using pCAL215 plasmid DNA as a template and primers HM3854 and HM3969. These two respective amplicons were used as templated to generate a PCR SOE product using primers HM3759 and HM3854.

HM3808 was constructed by transformation of HM712 genomic DNA into HM1. HM3933 was constructed by transformation of HM1333 genomic DNA into HM1451. HM3945 and HM3947 were constructed by transforming HM3157 genomic DNA into HM2916 and HM2522, respectively. HM3986, HM3988, and HM3990 were constructed by transforming plasmid pHM676 into *E. coli* DH5 $\alpha$ , HM1, and HM2521, respectively. HM4002, HM4003, and HM4004 were constructed by transforming plasmid pHM682 into *E. coli* DH5 $\alpha$ , HM1, and HM2521, respectively.

### Detailed plasmid construction

pHM430 was built using Gibson cloning from pAC $\lambda$ CI- $\beta$ -flap backbone (BamHI/NotI digested) and *B. subtilis* Mfd amplicon (AA492-AA625) amplicon with stop codon added (using primers HM3286 and HM3287). pHM431 was built using site-directed mutagenesis of pHM430 using primers HM3540 and H3541. pHM439 was built using Gibson cloning from pBR $\alpha$ - $\beta$ -flap backbone (BamHI/NotI digested and *B. subtilis* rpoB amplicon (AA21-AA131) with stop codon added (using primers HM3292 and HM3293).

pHM676 was built using digestion of pDR111 with SphI and subsequent ligation of a PCR amplicon generated with primers HM5418 and HM5419 and HM1 genomic DNA as a template.

pHM682 was built using digestion of pDR111 with *sphI* and subsequent ligation of a PCR amplicon generated with primers HM5462 and HM5463 and HM1 as a template.

pHM707 was built using digestion of pminiMAD2 with *kpnI* and *bamHI* and subsequent ligation of a PCR amplicon with primers HM1004 and HM1005 with HM1 genomic DNA as a template. Mutations were subsequently introduced via site-directed mutagenesis using primers HM3540 and HM3541.

### **Western blot assay**

Exponentially growing cultures were centrifuged, resuspended in Tris/Salt buffer (50 mM Tris-HCl pH 8, 300mM NaCl), and pelleted. Cell lysis buffer (10mM Tris-HCl pH7, 10mM EDTA, .1mM AEBSF, .1mg/ml lysozyme) was added and samples were incubated at 37° C for 15 minutes. SDS loading buffer was added to samples and 20µl was loaded onto Mini-PROTEAN TGX Precast Gels (BioRad) and run in Tris/SDS/Glycine running buffer in a Mini-PROTEAN Electrophoresis Cell (BioRad) at 200V for 40 minutes. Transfer was performed using the Trans-Blot Turbo Transfer System (BioRad). Anti-c-Myc antibody (1:5000 dilution) was added and blots were incubated overnight at 4° C. Anti-mouse antibodies (Li-Cor) (1:15000 dilution) was added and blot was imaged using the Odyssey CLx imaging system (Li-Cor).

### **Bacterial 2-hybrid assays**

Bacterial 2-hybrid assays were performed as previously described(2). Briefly, RNAP interacting domains of *B. subtilis* Mfd (WT and L522A) and the Mfd interacting domain of RpoB were fused to Lambda repressor the N-terminal domain of *E. coli* RNAP alpha subunit. Fusions were subsequently transformed into a strain of *E. coli* containing the lambda operator sequence upstream of a luciferase reporter gene. In order to measure relative light units (RLUs), *E. coli* strains were grown overnight at in LB + 20mM IPTG at 30° C. The following day, cells were diluted 1:100 into LB+20mM IPTG and growing until OD600 ~2.0. Measurement of RLUs was performed using the Nano-glo substrate (Promega), according to the manufacturer's instructions. Luminescence was measured using the SpectraMax M3 96-well plate reader.

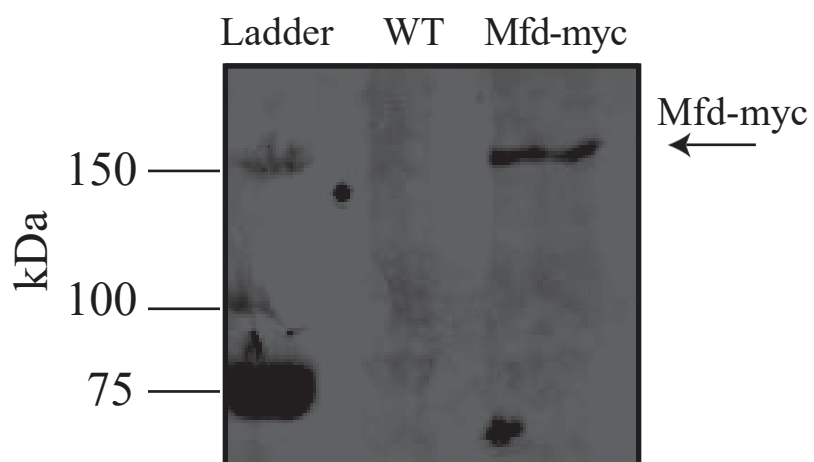

**Fig. S1. Western blot of *B. subtilis* Mfd-myc**

Western blot of *B. subtilis* WT and Mfd-myc. Anti-c-Myc antibody was used to probe blot.



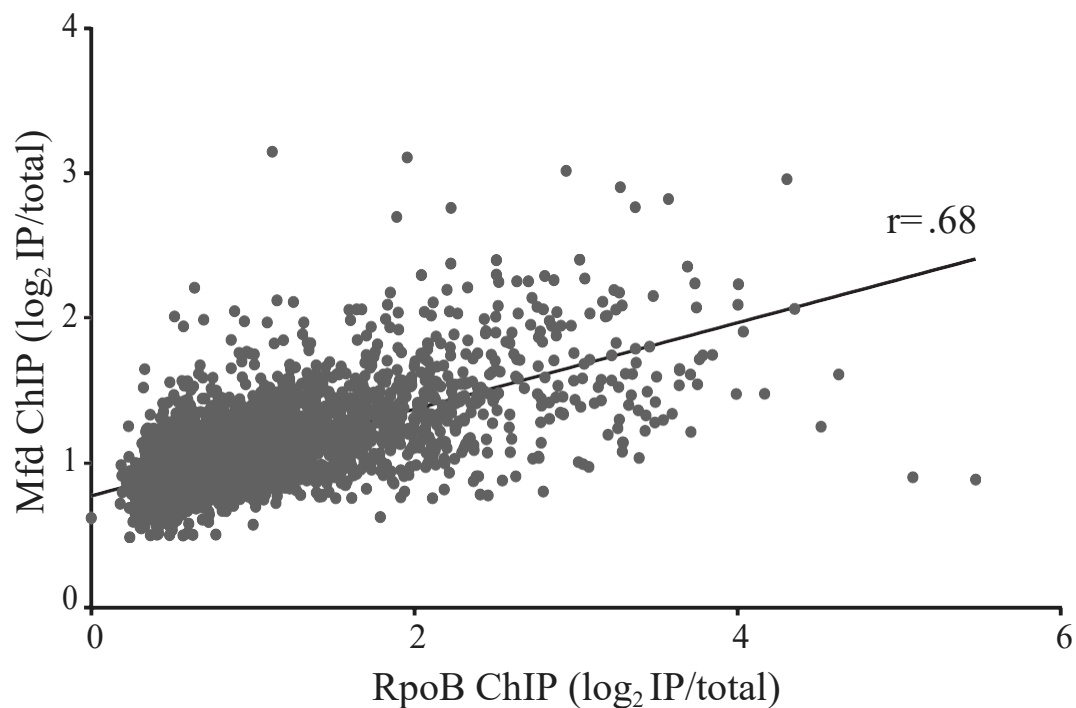

**Fig. S2. *B. subtilis* Mfd and RpoB ChIP-seq are correlated**

Linear regression analysis comparing binding of Mfd and RpoB at each gene in *B. subtilis*. Mfd-myc ChIP-seq (from Mfd-myc tagged *B. subtilis*) and RpoB ChIP-seq (from WT *B. subtilis*) read counts were determined for each gene in *B. subtilis* and normalized as described in Figure 2. Pearson's correlation coefficient for *B. subtilis* Mfd and RpoB = 0.68.

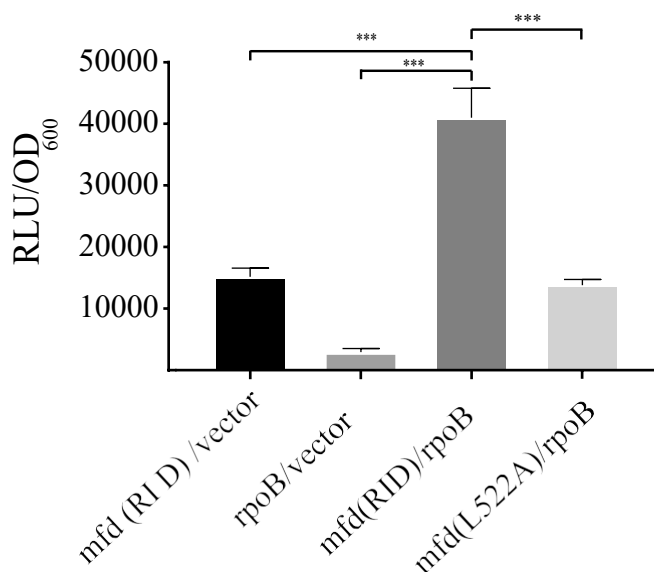

**Fig. S3. Bacterial two-hybrid assay exhibits abrogated binding between *B. subtilis* MfdL522A and RpoB.**

Disruption of Mfd L522 in *B. subtilis* abrogates interaction with RpoB. The interacting domains of RpoB and Mfd were cloned into a luciferase based bacterial 2-hybrid assay. Interactions between RpoB and Mfd and an MfdL522A mutant were measured, along with appropriate empty vector controls. Interactions were measured using luminescence and normalized to OD<sub>600</sub>. Data is from at least two independent experiments and error bars indicate standard deviation. Two-tailed students T-test was used to determine statistical significance (\*\*\*)p-value <0.001).

A

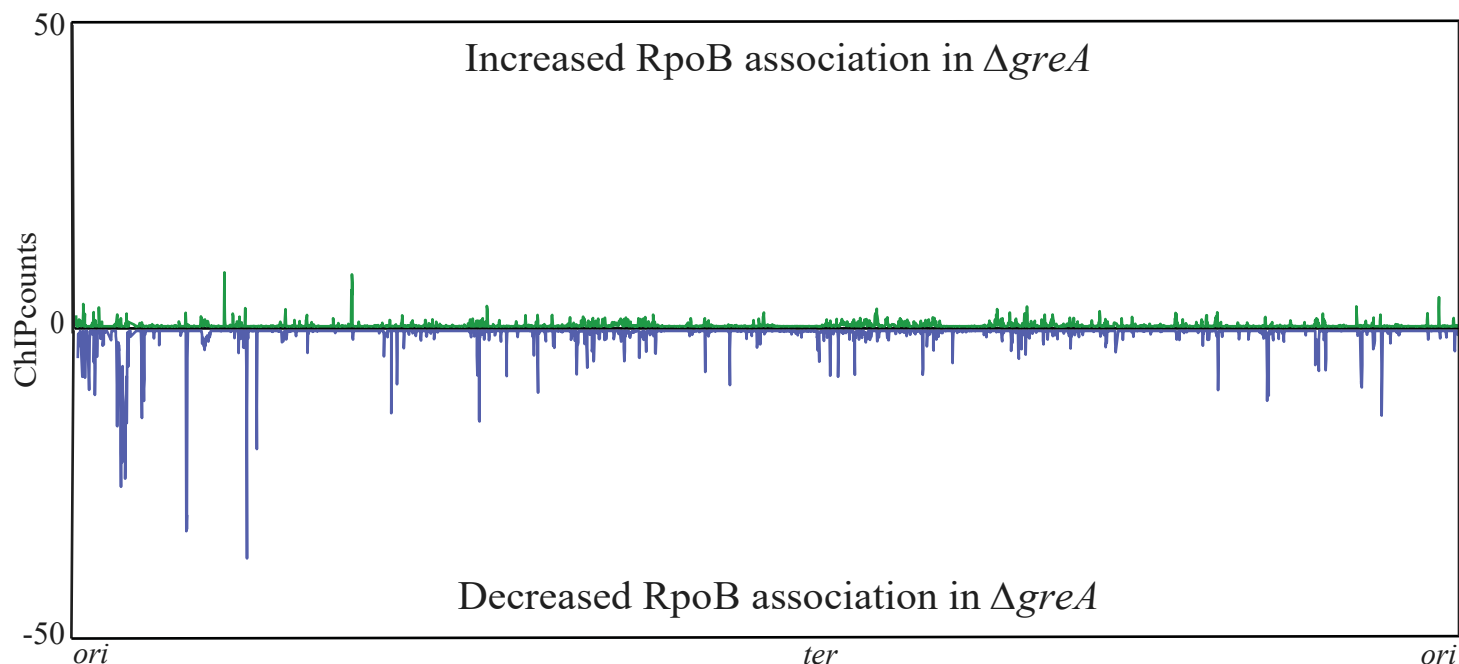

B

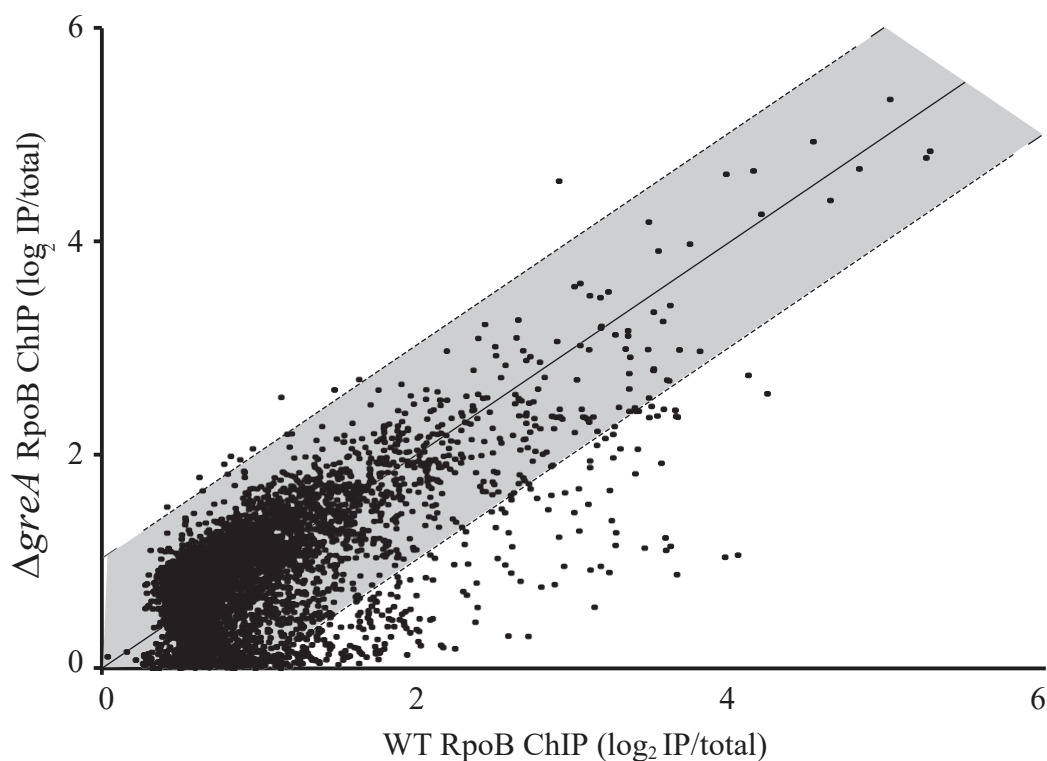

**Fig. S4. RNAP termination at structured regulatory RNAs is specific to Mfd**

RpoB ChIP-seq plots showing regions of RpoB enrichment in  $\Delta greA$  relative to WT. (A) Top half of graph (read counts in green) reflects normalized RpoB ChIP-seq counts where *B. subtilis*  $\Delta greA$  increased signal relative to WT. Bottom half of graph (read counts in blue) reflects RpoB ChIP-seq read counts where  $\Delta greA$  had decreased signal relative to WT. (B) Scatter plot of WT and  $\Delta greA$  RpoB ChIP-seq. Quantification of ChIP signal was performed as described in Figure 2B.S

| TUs with Mfd binding and increased RpoB in <i>Δmfd</i>          | regulatory RNA category |
|-----------------------------------------------------------------|-------------------------|
| <i>manP-manA-S439-yjdF</i>                                      | riboswitch, intergenic  |
| <i>S442-yjdH-S441-yjdG</i>                                      | 5' UTR, intergenic      |
| <i>S81-ybeF-ybfA-ybfB</i>                                       | 5' UTR                  |
| <i>txpA (as ratA)</i>                                           | asRNA, ncRNA            |
| <i>bsrH (as bsrH)</i>                                           | asRNA, ncRNA            |
| <i>S782-S783-yopT</i>                                           | 5' UTR                  |
| <i>S345-S346-yhaX</i>                                           | independent transcript  |
| <i>S823-ilvD</i>                                                | 5' UTR                  |
| <i>yabE (S25 asRNA)</i>                                         | asRNA, ncRNA            |
| <i>yrnT-mtnN-S1033-mccA-mccB-yrhC</i>                           | Intergenic              |
| <i>S1434-maeE</i>                                               | 5' UTR                  |
| <i>S1552-S1553-walR-walK-walH-wallI-walJ-htrC</i>               | 5' UTR                  |
| <i>S655-S654</i>                                                | independent transcript  |
| <i>yhfO-yhfQ-S364-yhfP</i>                                      | intergenic              |
| <i>S460-mhqA</i>                                                | 5' UTR                  |
| <i>bsrG (SR4 asRNA)</i>                                         | asRNA, ncRNA            |
| <i>S438-yjdB-S437</i>                                           | 5' UTR, 3' UTR          |
| <i>S27-rnmV-ksgA</i>                                            | 5' UTR                  |
| <i>S1123-nifZ-thiI-sspA</i>                                     | 5' UTR                  |
| <i>S1487-S1486-cydA-cydB-cydC-cydD</i>                          | 5' UTR                  |
| <i>S492-clpE</i>                                                | 5' UTR                  |
| <i>manR</i>                                                     | none                    |
| <i>ndoA-ndoA asRNA(S163-S164-S165)</i>                          | asRNA                   |
| <i>S811</i>                                                     | independent transcript  |
| <i>trnY locus</i>                                               | tRNA, intergenic        |
| <i>alaR-alaT-S1201</i>                                          | 3' UTR                  |
| <i>S1175-S1174-mntA-mntB-mntC-mntD</i>                          | 5' UTR                  |
| <i>S1427-S1426-atpI-atpB-atpE-atpF-atpH-atpA-atpG-atpD-atpC</i> | 5' UTR                  |
| <i>S895-yqxK</i>                                                | 5' UTR                  |
| <i>S1513-bglP-bglH-yxiE</i>                                     | 5' UTR, riboswitch      |
| <i>S321-glpF-glpK</i>                                           | 5' UTR, riboswitch      |
| <i>mhqN-mhqO-mhqP</i>                                           | none                    |
| <i>S1203-yugF</i>                                               | 5' UTR                  |
| <i>spoVM</i>                                                    | none                    |
| <i>S966-sdA (asRNA s965)</i>                                    | 5' UTR, asRNA           |
| <i>poly2-yqjX-S898-S897-yqjY-yqjZ-yqkA-yqkB-yqkC</i>            | intergenic              |
| <i>S82-S83-glpT-glpQ</i>                                        | 5' UTR, riboswitch      |

**Table S1. TUs with Mfd binding and increased RpoB occupancy in *Δmfd*.** Associated sRNA categories from previously defined work (3).

| TUs with decreased RpoB in <i>Δmfd</i>         | regulatory RNA category |
|------------------------------------------------|-------------------------|
| <i>srfAA-srfAB-comS-srfAC-srfAD</i>            | none                    |
| <i>rsbR-rsbS-rsbT-rsbU-rsbV-rsbW-sigB-rsbX</i> | none                    |
| <i>S1343-csbA-S1342</i>                        | 5' UTR, 3' UTR          |
| <i>Hpf</i>                                     | none                    |
| <i>ytxG-ytxH-ytxJ</i>                          | none                    |
| <i>ywjC-S1446</i>                              | 3' UTR                  |
| <i>mtlA-mtlF-mtlD</i>                          | none                    |
| <i>S408-yjbC-S409-spx</i>                      | 5' UTR, intergenic      |
| <i>S928-mgsR</i>                               | 5' UTR                  |
| <i>S426-yjcD (asS427-yjzE)</i>                 | asRNA                   |
| <i>Ctc</i>                                     | none                    |
| <i>ywiE-ywjA-ywjB</i>                          | none                    |
| <i>S294-csbB</i>                               | 5' UTR                  |
| <i>ypiA-ypiB</i>                               | none                    |
| <i>ahpF-ahpC</i>                               | none                    |
| <i>ybeC</i>                                    | none                    |
| <i>sunA-sunT-bdbA-yolJ-bdbB</i>                | none                    |
| <i>Ybyb</i>                                    | none                    |
| <i>ptsG-ptsH-ptsI</i>                          | none                    |
| <i>pdaC</i>                                    | none                    |
| <i>gtaB-S1363</i>                              | 3' UTR                  |
| <i>S476-ykoM</i>                               | 5' UTR                  |
| <i>serA</i>                                    | none                    |
| <i>rsbRD (as927)</i>                           | asRNA                   |
| <i>S1366</i>                                   | independent transcript  |
| <i>yjbB</i>                                    | none                    |
| <i>Icd</i>                                     | none                    |
| <i>S1171-ytkA-S1172-dps</i>                    | 5' UTR, intergenic      |
| <i>yjcH-yjcG-yjcF</i>                          | none                    |
| <i>S1301</i>                                   | independent transcript  |
| <i>ykzB-ykoL</i>                               | none                    |

**Table S2. TUs with decreased RpoB association in *Δmfd*.** Associated sRNA categories from previously defined work (3).

| <i>B. subtilis</i> TA gene  | Mfd ChIP-seq association | $\Delta mfd$ RpoB ChIP-seq fold enrichment |
|-----------------------------|--------------------------|--------------------------------------------|
| <i>txpA</i> (toxin)         | <b>18.1091</b>           | <b>3.6902</b>                              |
| RatA (antitoxin)            | <b>13.3760</b>           | <b>3.4526</b>                              |
| <i>bsrG</i> (toxin)         | <b>3.1852</b>            | <b>2.7718</b>                              |
| SR4 (antitoxin)             | <b>4.4111</b>            | <b>2.8398</b>                              |
| <i>bsrE</i> (toxin)         | 1.9520                   | 1.4331                                     |
| SR5 (antitoxin)             | 2.1053                   | 1.2556                                     |
| <i>yonT</i> (toxin)         | 1.8159                   | <b>3.6664</b>                              |
| as- <i>yonT</i> (antitoxin) | 1.7007                   | <b>3.7755</b>                              |
| <i>bsrH</i> (toxin)         | <b>10.4646</b>           | <b>3.5415</b>                              |
| as- <i>bsrH</i> (antitoxin) | <b>11.4629</b>           | <b>3.2391</b>                              |

**Table S3. Mfd association and RpoB occupancy of  $\Delta mfd$  strains at toxin- antitoxin genes.** Genes with bolded values fulfill criteria for significant differences in Mfd occupancy (defined as genes with an Mfd ChIP association one standard deviation greater than the mean) and/or significant increase in RpoB occupancy in  $\Delta mfd$  (criteria defined in detail in dataset S2).

| Strain | Genotype and Features                                                                         | Reference                                                     |
|--------|-----------------------------------------------------------------------------------------------|---------------------------------------------------------------|
| HM1    | WT <i>B. subtilis</i> JH642                                                                   | Brehm et al. J Bacteriol.1973                                 |
| HM712  | <i>B. subtilis</i> 168 $\Delta greA::mls$                                                     | Koo et al Cell Syst. 2017 (Bacillus Genetic Stock Center) (4) |
| HM2295 | <i>E. coli</i> F' (Kan) placOL2–62-lacZ                                                       | Dove et al Nature. 1997                                       |
| HM2521 | <i>B. subtilis</i> JH642 $\Delta mfd::mls$                                                    | Ragheb et al Mol Cell. 2019                                   |
| HM2602 | <i>E. coli</i> F' (Kan) placOL2–62-lacZ pSIM27(tet)                                           | Ragheb et al Mol Cell. 2019                                   |
| HM2747 | <i>E. coli</i> F' (Kan) placOL2–62-Nanoluc(hyg)                                               | Ragheb et al Mol Cell. 2019                                   |
| HM2769 | <i>E. coli</i> F' (Kan) placOL2–62-Nanoluc(hyg) pSIM27(tet) pHM430(cm)pHM439(amp)             | This study                                                    |
| HM2771 | <i>E. coli</i> F' (Kan) placOL2–62-Nanoluc(hyg) pSIM27(tet) pHM430(cm) pBR $\alpha$ (amp)     | This study                                                    |
| HM2773 | <i>E. coli</i> F' (Kan) placOL2–62-Nanoluc(hyg) pSIM27(tet) pAC $\lambda$ CI (cm) pHM439(amp) | This study                                                    |
| HM2916 | <i>E. coli</i> AG1111 pminiMAD2-mfdL522A                                                      | This study                                                    |
| HM2932 | <i>B. subtilis</i> JH642 MfdL522A                                                             | This study                                                    |
| HM2965 | <i>E. coli</i> F' (Kan) placOL2–62-Nanoluc(hyg) pSIM27(tet) pHM431(cm) pHM439(amp)            | This study                                                    |
| HM3157 | <i>B. subtilis</i> JH642 Mfd-1xmyc                                                            | This study                                                    |
| HM3808 | <i>B. subtilis</i> JH642 $\Delta greA::mls$                                                   | This study                                                    |
| HM3947 | <i>B. subtilis</i> JH642 MfdL522A-1xmyc                                                       | This study                                                    |

|                 |                                                                                |                                         |
|-----------------|--------------------------------------------------------------------------------|-----------------------------------------|
| HM3986          | <i>E. coli</i> DH5α pHM676                                                     | This study                              |
| HM3988          | <i>B. subtilis</i> JH642 amyE::P <sub>spank</sub> -txpA                        | This study                              |
| HM3990          | <i>B. subtilis</i> JH642 amyE::P <sub>spank</sub> -txpA $\Delta$ mfd::mls      | This study                              |
| HM4002          | <i>E. coli</i> DH5α pHM682                                                     | This study                              |
| HM4003          | <i>B. subtilis</i> JH642 amyE::P <sub>spank</sub> -bsrH                        | This study                              |
| HM4004          | <i>B. subtilis</i> JH642 amyE::P <sub>spank</sub> -bsrH $\Delta$ mfd::mls      | This study                              |
| <b>Plasmids</b> | <b>Description</b>                                                             | <b>Reference</b>                        |
| pBRα            | Used as a negative control in bacterial 2-hybrid assays                        | Dove et al Nature. 1997 (Addgene 53731) |
| pBRα-β-flap     | Used to clone and express RNA polymerase α-subunit fusions in <i>E. coli</i>   | Dove et al Nature. 1997 (Addgene 53734) |
| pACλCI          | Used as a negative control in bacterial 2-hybrid assays                        | Dove et al Nature. 1997 (Addgene 53730) |
| pACλCI-β-flap   | Used to clone and express λCI fusions in <i>E. coli</i>                        | Dove et al Nature. 1997 (Addgene 53733) |
| pHM430          | Plac-CI-Bsubmfd(494-625)                                                       | This study                              |
| pHM431          | Plac-CI-Bsubmfd(494-625)L522A                                                  | This study                              |
| pHM439          | Plac-a-BsubrpoB(21-131)                                                        | This study                              |
| pHM676          | amp <sup>R</sup> , amyE::P <sub>spank(hy)</sub> -txpA, lacI, spec <sup>R</sup> | This study                              |
| pHM682          | amp <sup>R</sup> , amyE::P <sub>spank(hy)</sub> -bsrH, lacI, spec <sup>R</sup> | This study                              |
| pHM707          | pminiMAD2-BsubMfdL522A                                                         | This study                              |
| pDR111          | amp <sup>R</sup> , amyE::P <sub>spank(hy)</sub> , lacI, spec <sup>R</sup>      | Guérout-Fleury et al Gene. 1996 (5)     |
| pminiMAD2       | Scarless integration plasmid for <i>B. subtilis</i>                            | Patrick and Kearns Mol Micro. 2008 (1)  |
| pNL1.1          | NanoLuc expression vector                                                      | Promega (GenBank Accession #JQ513379)   |

**Table S4. Bacterial strains and plasmids used in this study.**



| Primer # | Sequence                                                             | Description                                                                                                              |
|----------|----------------------------------------------------------------------|--------------------------------------------------------------------------------------------------------------------------|
| HM1004   | CATGAGGGTACCGATGATCAGCGGT<br>CAATTGA                                 | For amplifying <i>B. subtilis mfd</i> to insert into pminiMAD2                                                           |
| HM1005   | CATGAG GGATCCCATAGTGCTGCT<br>GTGCCAA                                 | For amplifying <i>B. subtilis mfd</i> to insert into pminiMAD2                                                           |
| HM3286   | AGTGGCCTGAAGAGACGTTTGGCGCA<br>AAAAGCTATTCTGAGCTTCAAATTG              | For amplifying <i>B. subtilis mfd</i> (bp 1483-1875) with homology to pACCI for Gibson and extra base to maintain frame. |
| HM3287   | CTGCGATGCAGATCTGTAAGGTAAGTT<br>AAGTCTCTTGATAAGGGAAAGCC               | For amplifying <i>B. subtilis mfd</i> (bp 1483-1875) with homology to pACCI for Gibson with stop codon added             |
| HM3292   | AAGTGAAAGAAGAGAAACCAGAGGCA<br>GAAGTGTTAGAATTACCAAATCTCATT<br>G       | For amplifying <i>B. subtilis rpoB</i> (bp 64-393) with homology to pBRa for Gibson and extra base to maintain frame.    |
| HM3293   | CGGCCACGATGCGTCCGGCGTAGAGT<br>TATTCCGCACCGTTAATGATAAAAG              | For amplifying <i>B. subtilis rpoB</i> (bp 64-393) R with homology to pBRa for Gibson and stop codon added.              |
| HM3540   | GAATGCCGTTGATTTACAGAGTTTCAA<br>TCCCCAGGTATTTTCCG                     | Quickchange primer to make L522A <i>mfd</i> mutation                                                                     |
| HM3541   | CGGAAAATACCTGGGGATTGAAACTG<br>CTGAAATCAACGGCATTG                     | Reverse quickchange primer to make L522A <i>mfd</i> mutation                                                             |
| HM3759   | CAAGTCCTCTTCACTGATTAAGTTCTG<br>CTCCGTTGATGAAATGGTTTGCT               | For amplifying C-terminally myc tagged <i>mfd</i> by SOE PCR                                                             |
| HM3760   | GAGCAGAAGTTAATCAGTGAAGAGGA<br>CTTGTAATTTTGTTACTCTCTGGTGTA<br>TATTAC  | For amplifying C-terminally myc tagged <i>mfd</i> by SOE PCR                                                             |
| HM3854   | CGAGGCTCCTGTCACTGCT                                                  | For amplifying erm-HI cassette                                                                                           |
| HM3969   | GAGCAGAAGTTAATCAGTGAAGAGGA<br>CTTGATTTTGTTACGCAGGCGAGAAAG<br>GAGAGAG | For amplifying erm-HI cassette with myc tag at 5' end                                                                    |

|        |                                           |                                                            |
|--------|-------------------------------------------|------------------------------------------------------------|
| HM5162 | ACACTCCTCATGTTTGCCTT                      | For <i>B. subtilis tnrY</i> qPCR                           |
| HM5163 | GTGTCGGCGGTTTCGATT                        | For <i>B. subtilis tnrY</i> qPCR                           |
| HM5418 | CATGATGCTAGCTGAAAGGAGGTGAA<br>ATTATGTCGAC | For making <i>txpA</i> overexpression<br>construct cloning |
| HM5419 | CATGATGCATGCCTACCCTTTAATAGG<br>AGGGT      | For making <i>txpA</i> overexpression<br>construct cloning |
| HM5437 | CAAGCAAAGTATTGCAACT                       | For <i>B. subtilis ratA</i> qPCR                           |
| HM5438 | GGTAATGTGGTAATGTGGTA                      | For <i>B. subtilis ratA</i> qPCR                           |
| HM5441 | ATGTCGACCT ATGAATCTCT                     | For <i>B. subtilis txpA</i> qPCR                           |
| HM5442 | CCCATGTCATAATCCCGCCT                      | For <i>B. subtilis txpA</i> qPCR                           |
| HM5462 | CATGATGCTAGCATGGTTTAGTATAAA<br>TGAAT      | For making <i>bsrH</i> overexpression<br>construct cloning |
| HM5463 | CATGATGCATGCAAGAGACCCGGTTG<br>CCGCCGGG    | For making <i>bsrH</i> overexpression<br>construct cloning |

**Table S5. Oligonucleotides used in this study.**

**Dataset S1 (separate file)** Quantification of Mfd association of genes in the *B. subtilis* 168 genome. Mfd-myc binding was calculated by taking the average read count across a given gene and normalizing internally to overall read counts as well as to WT *B. subtilis* (lacking a myc tag). Values were subsequently  $\log_2$  normalized. Genes are sorted from highest to lowest Mfd binding values. Those genes with greater than one standard deviation from the mean Mfd-myc binding value were defined as Mfd associated.

**Dataset S2 (separate file)** Genes with increased RpoB ChIP association in  $\Delta mfd$ , sorted by increasing p-value. (logFC= log-fold change, logCPM= log counts per million, FDR= false discovery rate). The following criteria were used to define increased RpoB association=  $\log FC > 1$ ,  $\log CPM > 4$ ,  $p\text{-value} < 1 \times 10^{-4}$ ,  $FDR < .001$ .

**Dataset S3 (separate file)** Genes with decreased RpoB ChIP association in  $\Delta mfd$ , sorted by increasing p-value. Criteria used to define decreased RpoB association is the same as described in Table S1.

**Dataset S4 (separate file)** Genes with altered RpoB ChIP association in  $\Delta greA$ . Genes are sorted by increasing p-value, with the first 12 genes exhibiting increased RpoB occupancy in  $\Delta greA$  and the remaining genes exhibiting decreased RpoB occupancy in  $\Delta greA$ . To define significant differences, the same criteria were used as described in Tables S1 and S2.

**Dataset S5 (separate file)** Upregulated and Downregulated genes in *B. subtilis*  $\Delta mfd$  strain. Genes are sorted by increasing p-value. The following criteria was used to define transcriptional differences =  $\log FC > 1$ ,  $\log CPM > 2$ ,  $FDR < .05$

## Supplementary References

1. J. E. Patrick, D. B. Kearns, MinJ (YvjD) is a topological determinant of cell division in *Bacillus subtilis*. *Mol. Microbiol.* **70**, 1166–79 (2008).
2. Dove, S. L., Joung, J. K. & Hochschild, A. Activation of prokaryotic transcription through arbitrary protein- protein contacts. *Nature* **386**, 627–630 (1997).
3. B. Zhu, J. Stülke, SubtiWiki in 2018: from genes and proteins to functional network annotation of the model organism *Bacillus subtilis*. *Nucleic Acids Res.* **46**, 743–748 (2017).
4. B. M. Koo, *et al.*, Construction and Analysis of Two Genome-Scale Deletion Libraries for *Bacillus subtilis*. *Cell Syst.* **4**, 291-305.e7 (2017).
5. A. M. Guérout-Fleury, N. Frandsen, P. Stragier, Plasmids for ectopic integration in *Bacillus subtilis*. *Gene* **180**, 57–61 (1996).
